# Supplementary material for: Two Antimicrobial Heterodimeric Tetrahydroxanthones with a 7,7′-Linkage from Mangrove Endophytic Fungus Aspergillus flavus QQYZ
Source: MDPI journal article supplement (doi:10.3390/molecules27092691), 2022-04-22
Supplement: s1 [file s1]

## Supplementary Information

### Two Antimicrobial Heterodimeric Tetrahydroxanthones with a 7,7'-Linkage from Mangrove Endophytic Fungus

*Aspergillus flavus* QQYZ

Zhenming Zang <sup>1</sup>, Wencong Yang <sup>1</sup>, Hui Cui <sup>2</sup>, Runlin Cai <sup>3</sup>, Chunyuan Li <sup>4</sup>, Ge Zou <sup>1</sup>,  
Bo Wang <sup>1,\*</sup> and Zhigang She <sup>1,\*</sup>

<sup>1</sup> School of Chemistry, Sun Yat-sen University, Guangzhou 510275, China; zangzhm@mail2.sysu.edu.cn (Z.Z.); yangwc6@mail2.sysu.edu.cn (W.Y.); zoug5@mail2.sysu.edu.cn (G.Z.)

<sup>2</sup> School of Pharmaceutical Sciences, Guangzhou University of Chinese Medicine, Guangzhou 510006, China; cuihui@gzucm.edu.cn

<sup>3</sup> College of Science, Shantou University, Shantou 515063, China; rlcai@stu.edu.cn

<sup>4</sup> College of Materials and Energy, South China Agricultural University, Guangzhou 510642, China; chunyuanyanli@scau.edu.cn

\* Correspondence: ceswb@mail.sysu.edu.cn (B.W.); cesszhg@mail.sysu.edu.cn (Z.S.); Tel.: +86-20-84113356 (Z.S.)

## List of Supplementary Information

### Content

|                                                                                                                                                            |    |
|------------------------------------------------------------------------------------------------------------------------------------------------------------|----|
| <b>Figure S1.</b> HRESIMS of aflaxanthone A ( <b>1</b> ).....                                                                                              | 4  |
| <b>Figure S2.</b> $^1\text{H}$ NMR spectrum of aflaxanthone A ( <b>1</b> ) in $\text{MeOD}-d_4$ and $\text{CDCl}_3$ at 500 MHz                             | 4  |
| <b>Figure S3.</b> $^{13}\text{C}$ NMR spectrum of aflaxanthone A ( <b>1</b> ) in $\text{MeOD}-d_4$ and $\text{CDCl}_3$ at 125 MHz                          | 5  |
| <b>Figure S4.</b> HSQC spectrum of aflaxanthone A ( <b>1</b> ) in $\text{MeOD}-d_4$ and $\text{CDCl}_3$ at 500 MHz and 125 MHz.....                        | 5  |
| <b>Figure S5.</b> $^1\text{H}$ - $^1\text{H}$ COSY spectrum of aflaxanthone A ( <b>1</b> ) in $\text{MeOD}-d_4$ and $\text{CDCl}_3$ at 500 MHz.....        | 6  |
| <b>Figure S6.</b> HMBC spectrum of aflaxanthone A ( <b>1</b> ) in $\text{MeOD}-d_4$ and $\text{CDCl}_3$ at 500 MHz and 125 MHz.....                        | 6  |
| <b>Figure S7.</b> NOESY spectrum of aflaxanthone A ( <b>1</b> ) in $\text{MeOD}-d_4$ and $\text{CDCl}_3$ at 500 MHz.                                       | 7  |
| <b>Figure S8.</b> HRESIMS of aflaxanthone B ( <b>2</b> ) .....                                                                                             | 7  |
| <b>Figure S9.</b> $^1\text{H}$ NMR spectrum of aflaxanthone B ( <b>2</b> ) in $\text{MeOD}-d_4$ and $\text{CDCl}_3$ at 500 MHz, 298K .....                 | 8  |
| <b>Figure S10.</b> $^{13}\text{C}$ NMR spectrum of aflaxanthone B ( <b>2</b> ) in $\text{MeOD}-d_4$ and $\text{CDCl}_3$ at 125 MHz, 298K.....              | 8  |
| <b>Figure S11.</b> HSQC spectrum of aflaxanthone B ( <b>2</b> ) in $\text{MeOD}-d_4$ and $\text{CDCl}_3$ at 500 MHz and 125MHz, 298K.....                  | 9  |
| <b>Figure S12.</b> $^1\text{H}$ NMR spectrum of aflaxanthone B ( <b>2</b> ) in $\text{MeOD}-d_4$ and $\text{CDCl}_3$ at 500 MHz, 273K .....                | 9  |
| <b>Figure S13.</b> $^1\text{H}$ NMR spectrum of aflaxanthone B ( <b>2</b> ) in $\text{MeOD}-d_4$ and $\text{CDCl}_3$ at 500 MHz, 243K .....                | 10 |
| <b>Figure S14.</b> $^{13}\text{C}$ NMR spectrum of aflaxanthone B ( <b>2</b> ) in $\text{MeOD}-d_4$ and $\text{CDCl}_3$ at 125 MHz, 243K.....              | 10 |
| <b>Figure S15.</b> HSQC spectrum of aflaxanthone B ( <b>2</b> ) in $\text{MeOD}-d_4$ and $\text{CDCl}_3$ at 500MHz and 125 MHz, 243K.....                  | 11 |
| <b>Figure S16.</b> $^1\text{H}$ - $^1\text{H}$ COSY spectrum of aflaxanthone B ( <b>2</b> ) in $\text{MeOD}-d_4$ and $\text{CDCl}_3$ at 500 MHz, 243K..... | 11 |
| <b>Figure S17.</b> HMBC spectrum of aflaxanthone B ( <b>2</b> ) in $\text{MeOD}-d_4$ and $\text{CDCl}_3$ at 500MHz and 125 MHz, 243K.....                  | 12 |
| <b>Figure S18.</b> NOESY spectrum of aflaxanthone B ( <b>2</b> ) in $\text{MeOD}-d_4$ and $\text{CDCl}_3$ at 500MHz and 125 MHz, 243K.....                 | 13 |

|                                                                                                                                                                                                               |    |
|---------------------------------------------------------------------------------------------------------------------------------------------------------------------------------------------------------------|----|
| <b>Figure S19.</b> Chiral HPLC separation profile of <b>1</b> and <b>2</b> .....                                                                                                                              | 13 |
| <b>Table S1.</b> Gibbs free energy and Boltzmann population of low energy of<br>5 <i>S</i> ,7 <i>R</i> ,10 <i>aR</i> ,5' <i>S</i> ,7' <i>S</i> ,10 <i>a'</i> <i>S</i> - <b>1</b> in CH <sub>3</sub> CN .....  | 14 |
| <b>Table S2.</b> Cartesian coordinates for the low-energy optimized conformer of <b>1a</b> at<br>B3LYP/6–311+g (d,p) level of theory in CH <sub>3</sub> CN.....                                               | 14 |
| <b>Table S3.</b> Cartesian coordinates for the low-energy optimized conformer of <b>1b</b> at<br>B3LYP/6–311+g (d,p) level of theory in CH <sub>3</sub> CN.....                                               | 16 |
| <b>Table S4.</b> Cartesian coordinates for the low-energy optimized conformer of <b>1c</b> at<br>B3LYP/6–311+g (d,p) level of theory in CH <sub>3</sub> CN.....                                               | 17 |
| <b>Table S5.</b> Cartesian coordinates for the low-energy optimized conformer of <b>1d</b> at<br>B3LYP/6–311+g (d,p) level of theory in CH <sub>3</sub> CN.....                                               | 19 |
| <b>Table S6.</b> Cartesian coordinates for the low-energy optimized conformer of <b>1e</b> at<br>B3LYP/6–311+g (d,p) level of theory in CH <sub>3</sub> CN.....                                               | 21 |
| <b>Table S7.</b> Cartesian coordinates for the low-energy optimized conformer of <b>1f</b> at<br>B3LYP/6–311+g (d,p) level of theory in CH <sub>3</sub> CN.....                                               | 23 |
| <b>Table S8.</b> Cartesian coordinates for the low-energy optimized conformer of <b>1g</b> at<br>B3LYP/6–311+g (d,p) level of theory in CH <sub>3</sub> CN.....                                               | 25 |
| <b>Table S9.</b> Cartesian coordinates for the low-energy optimized conformer of <b>1h</b> at<br>B3LYP/6–311+g (d,p) level of theory in CH <sub>3</sub> CN.....                                               | 26 |
| <b>Table S10.</b> Cartesian coordinates for the low-energy optimized conformer of <b>1i</b> at<br>B3LYP/6–311+g (d,p) level of theory in CH <sub>3</sub> CN.....                                              | 28 |
| <b>Table S11.</b> Cartesian coordinates for the low-energy optimized conformer of <b>1j</b> at<br>B3LYP/6–311+g (d,p) level of theory in CH <sub>3</sub> CN.....                                              | 30 |
| <b>Table S12.</b> Gibbs free energy and Boltzmann population of low energy of<br>5 <i>S</i> ,7 <i>R</i> ,10 <i>aR</i> ,5' <i>S</i> ,7' <i>R</i> ,10 <i>a'</i> <i>R</i> - <b>2</b> in CH <sub>3</sub> CN ..... | 32 |
| <b>Table S13.</b> Cartesian coordinates for the low-energy optimized conformer of <b>2a</b> at<br>B3LYP/6–311+g (d,p) level of theory in CH <sub>3</sub> CN.....                                              | 32 |
| <b>Table S14.</b> Cartesian coordinates for the low-energy optimized conformer of <b>2b</b> at<br>B3LYP/6–311+g (d,p) level of theory in CH <sub>3</sub> CN.....                                              | 34 |
| <b>Table S15.</b> Cartesian coordinates for the low-energy optimized conformer of <b>2c</b> at<br>B3LYP/6–311+g (d,p) level of theory in CH <sub>3</sub> CN.....                                              | 35 |
| <b>Table S16.</b> Cartesian coordinates for the low-energy optimized conformer of <b>2d</b> at<br>B3LYP/6–311+g (d,p) level of theory in CH <sub>3</sub> CN.....                                              | 37 |

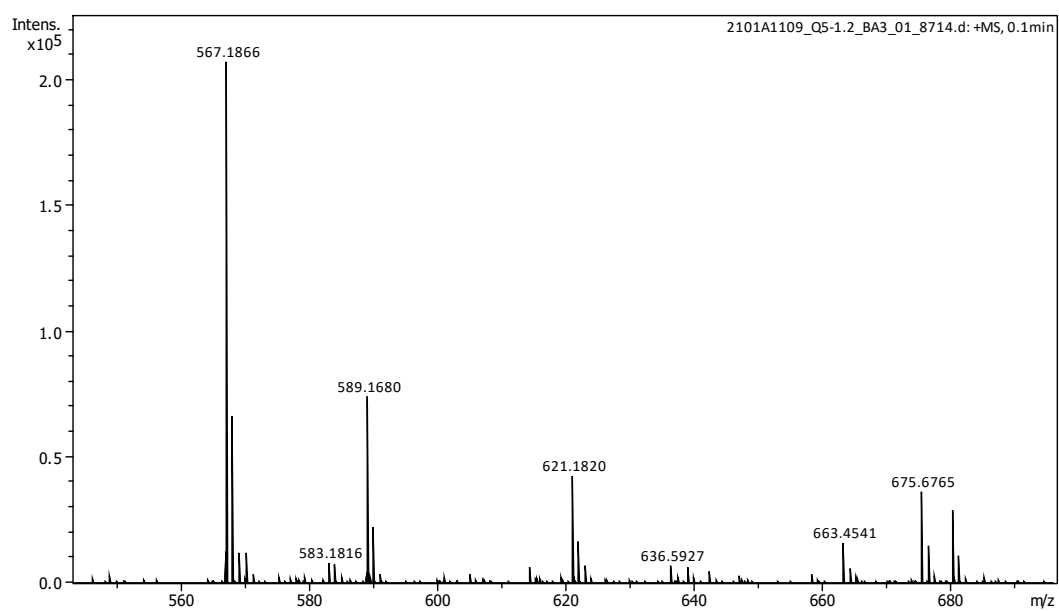

**Figure S1.** HRESIMS of aflaxanthone A (**1**).

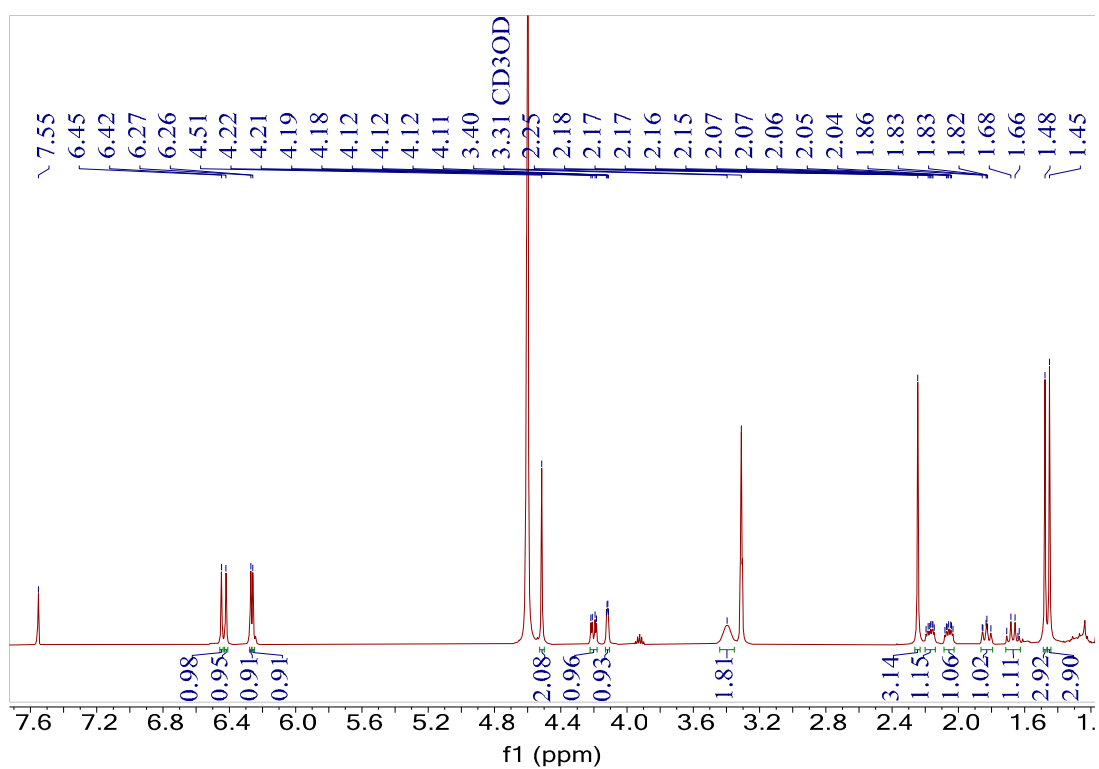

**Figure S2.** <sup>1</sup>H NMR spectrum of aflaxanthone A (**1**) in MeOD-*d*<sub>4</sub> and CDCl<sub>3</sub> at 500 MHz.

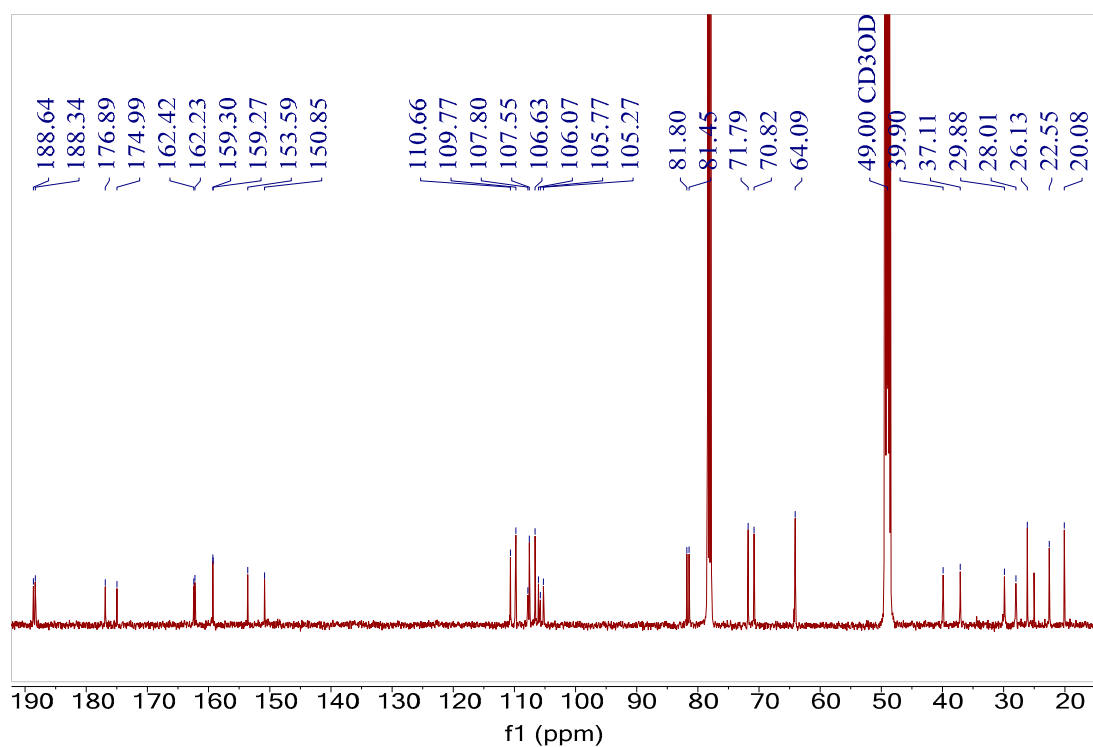

**Figure S3.**  $^{13}\text{C}$  NMR spectrum of aflaxanthone A (**1**) in  $\text{MeOD-}d_4$  and  $\text{CDCl}_3$  at 125 MHz.

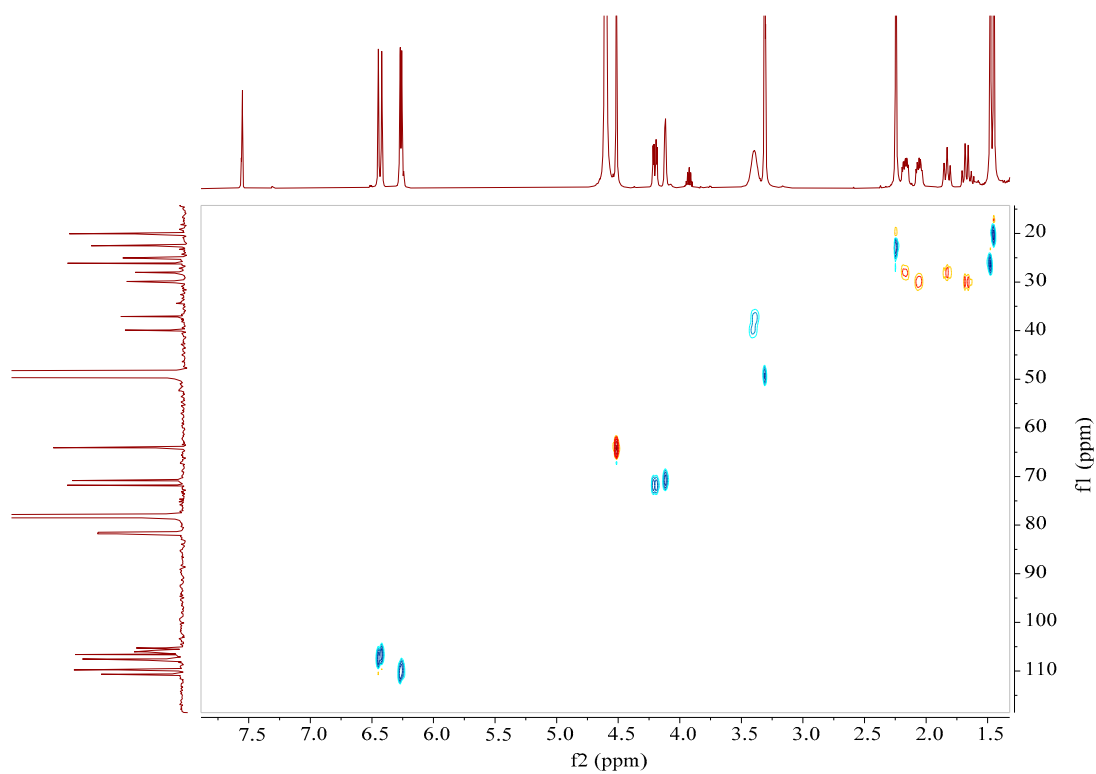

**Figure S4.** HSQC spectrum of aflaxanthone A (**1**) in  $\text{MeOD-}d_4$  and  $\text{CDCl}_3$  at 500 MHz and 125 MHz.

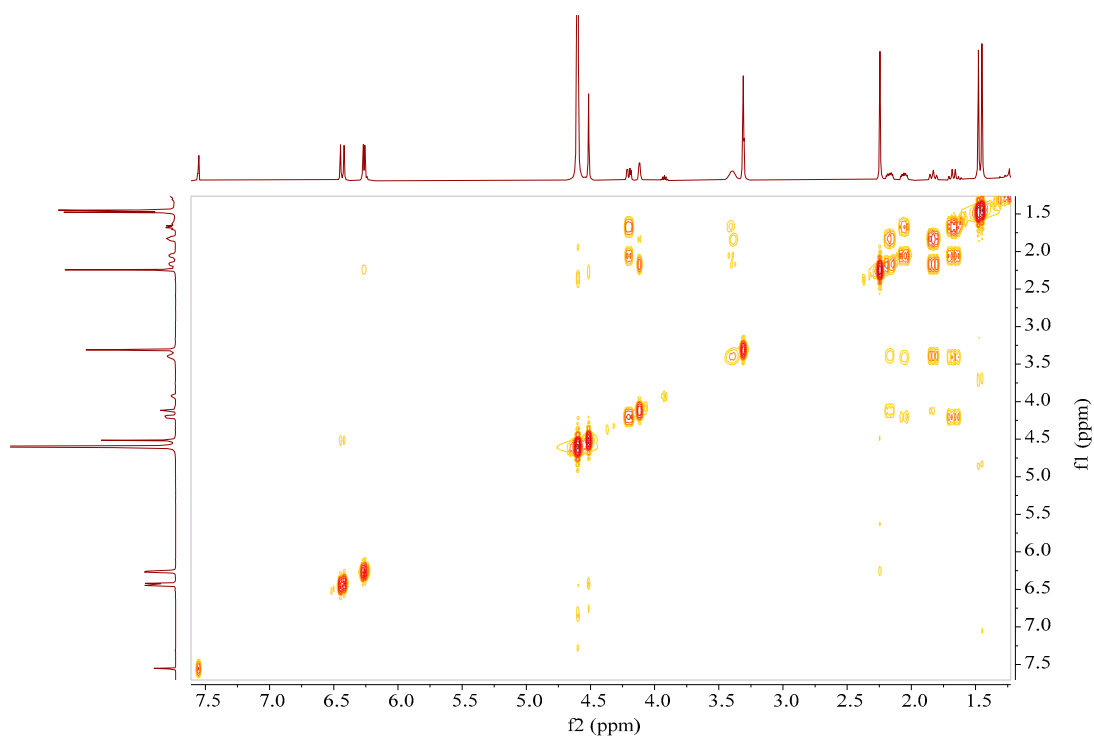

**Figure S5.**  $^1\text{H}$ - $^1\text{H}$  COSY spectrum of aflaxanthone A (**1**) in  $\text{MeOD-}d_4$  and  $\text{CDCl}_3$  at 500 MHz.

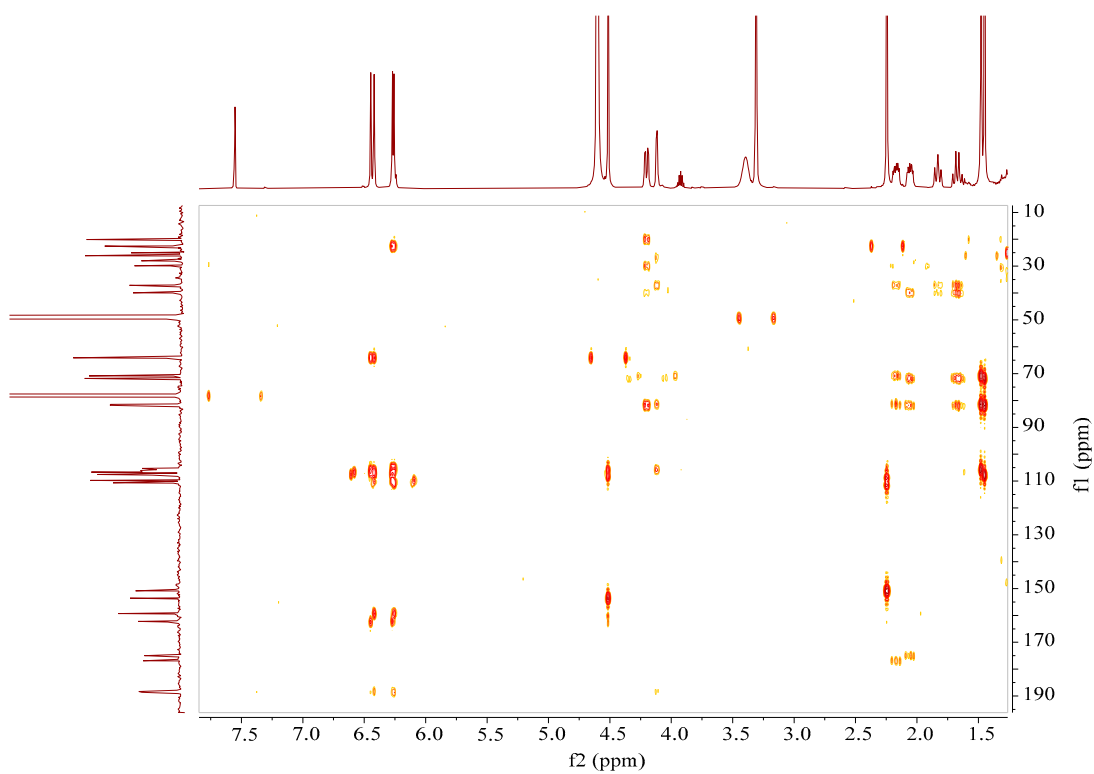

**Figure S6.** HMBC spectrum of aflaxanthone A (**1**) in  $\text{MeOD-}d_4$  and  $\text{CDCl}_3$  at 500 MHz and 125 MHz.

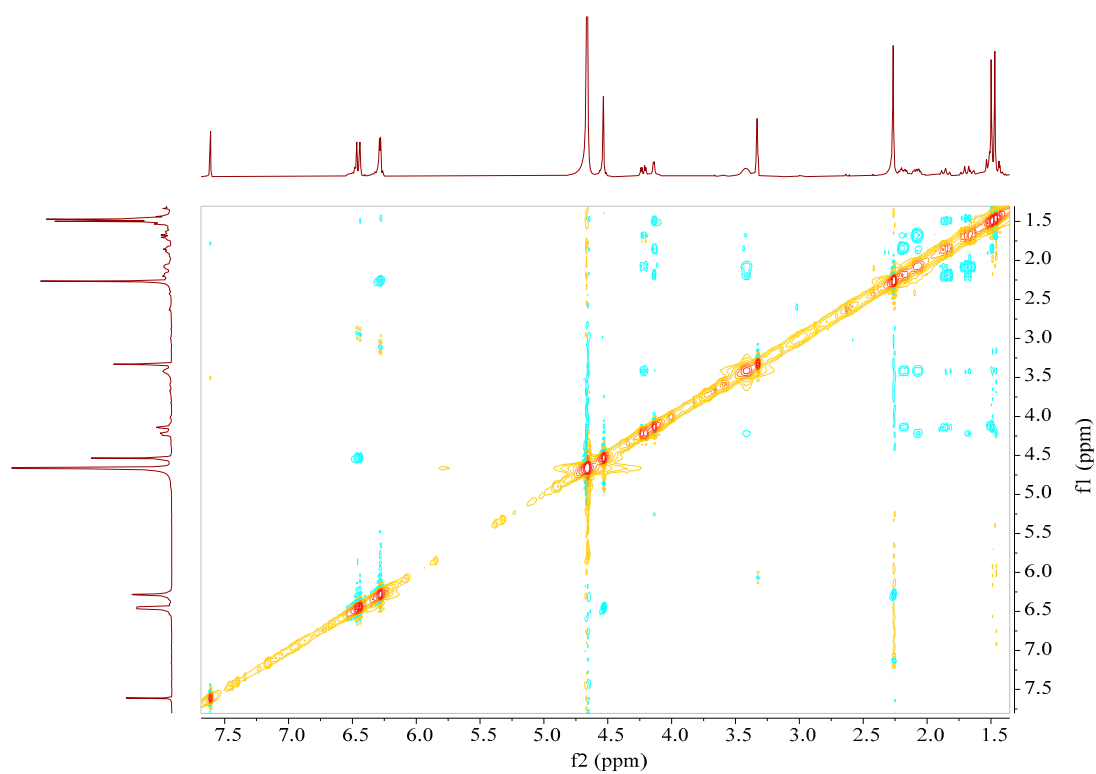

**Figure S7.** NOESY spectrum of aflaxanthone A (**1**) in MeOD- $d_4$  and  $CDCl_3$  at 500 MHz.

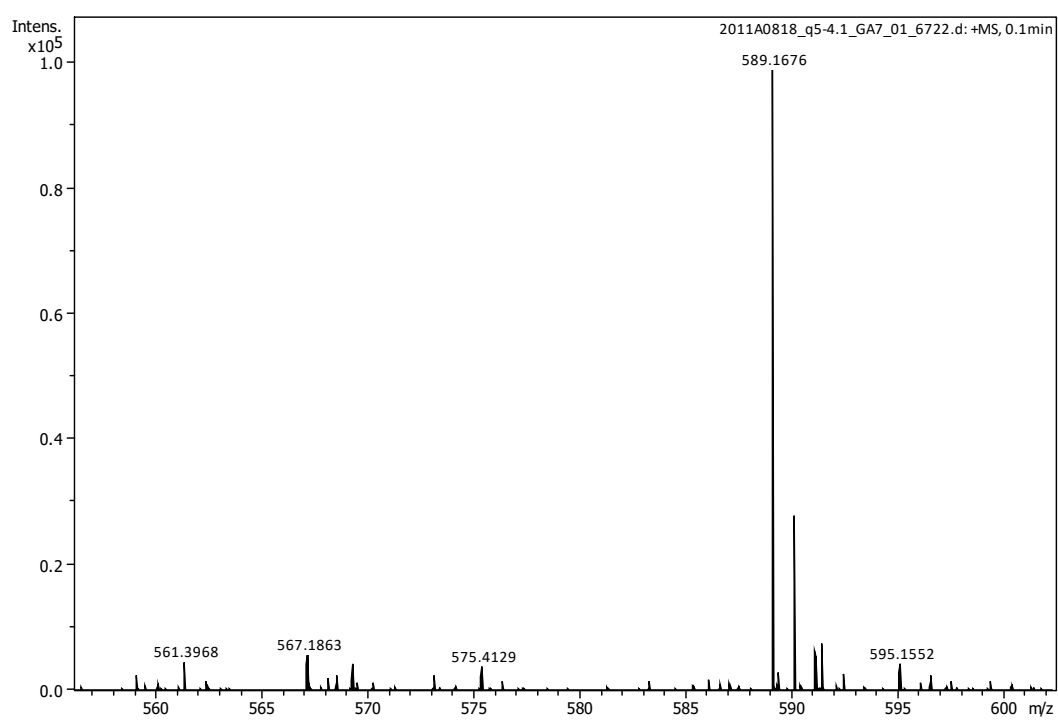

**Figure S8.** HRESIMS of aflaxanthone B (**2**).

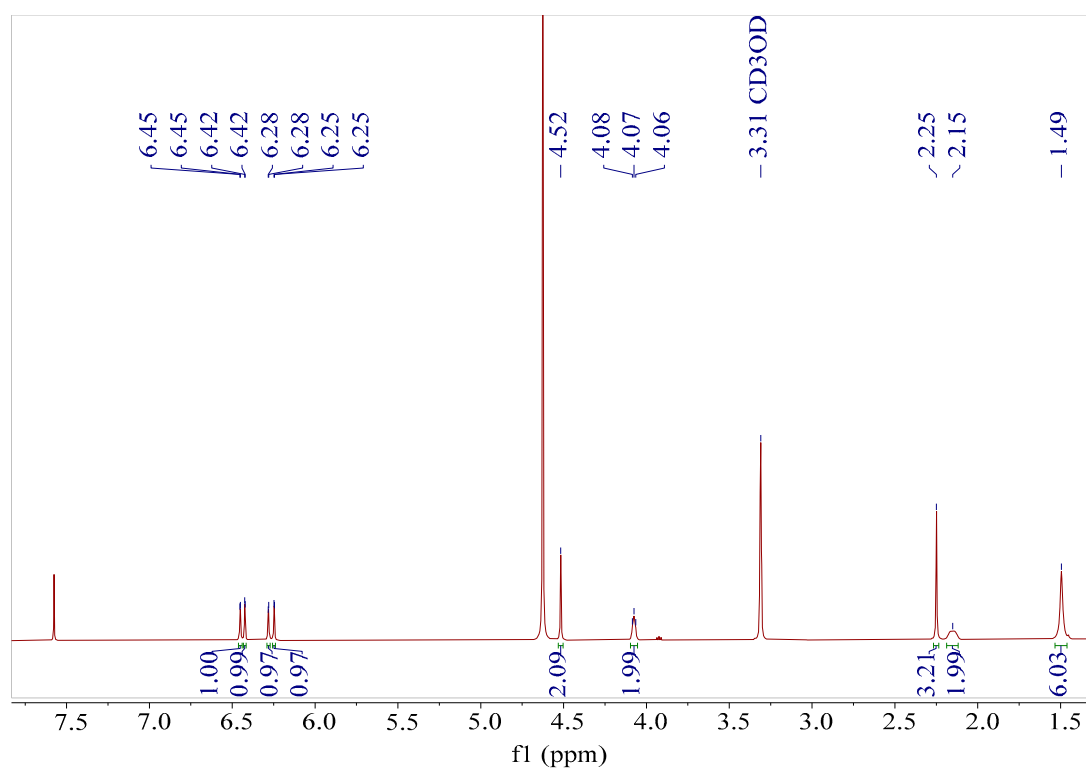

**Figure S9.** <sup>1</sup>H NMR spectrum of aflaxanthone B (**2**) in MeOD-*d*<sub>4</sub> and CDCl<sub>3</sub> at 500 MHz, 298K.

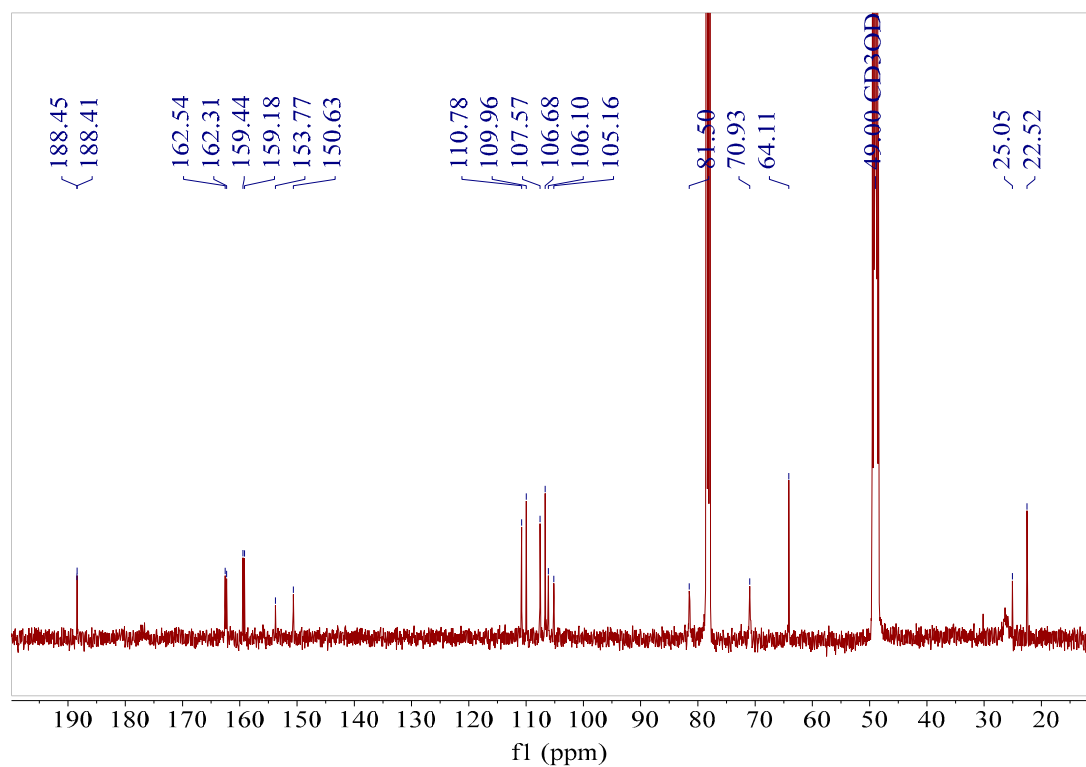

**Figure S10.** <sup>13</sup>C NMR spectrum of aflaxanthone B (**2**) in MeOD-*d*<sub>4</sub> and CDCl<sub>3</sub> at 125 MHz, 298K.



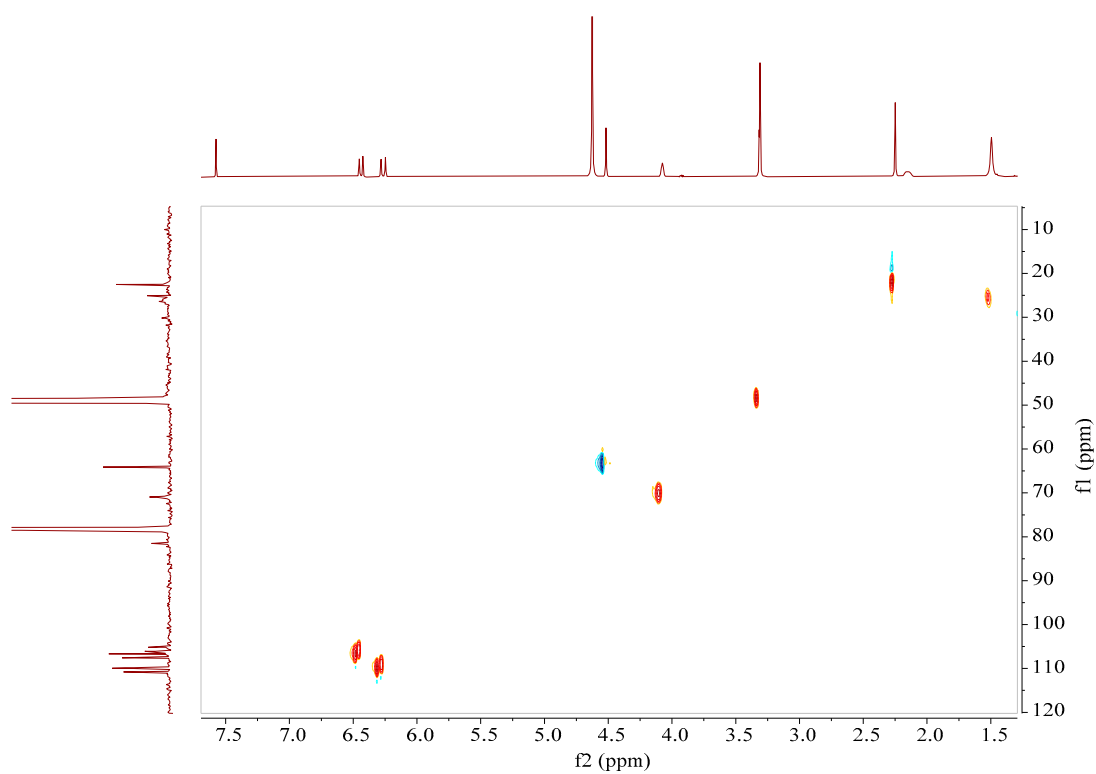

**Figure S11.** HSQC spectrum of aflaxanthone B (**2**) in  $\text{MeOD-}d_4$  and  $\text{CDCl}_3$  at 500 MHz and 125MHz, 298K.

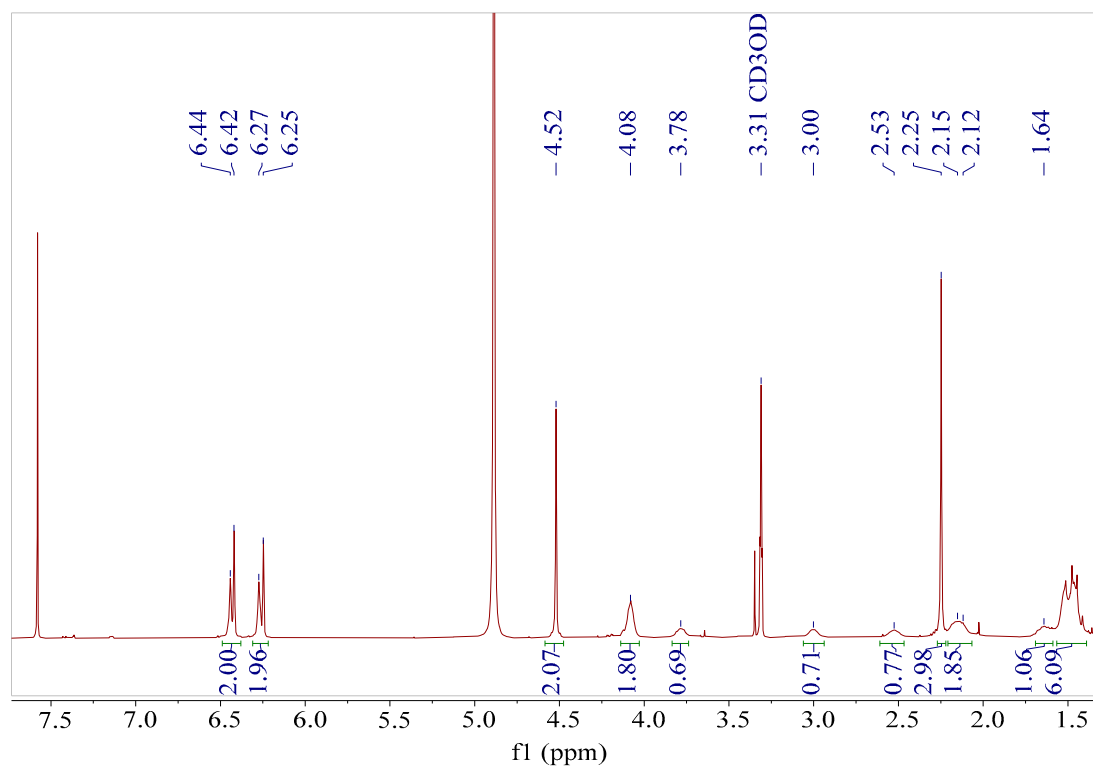

**Figure S12.**  $^1\text{H}$  NMR spectrum of aflaxanthone B (**2**) in  $\text{MeOD-}d_4$  and  $\text{CDCl}_3$  at 500 MHz, 273K.

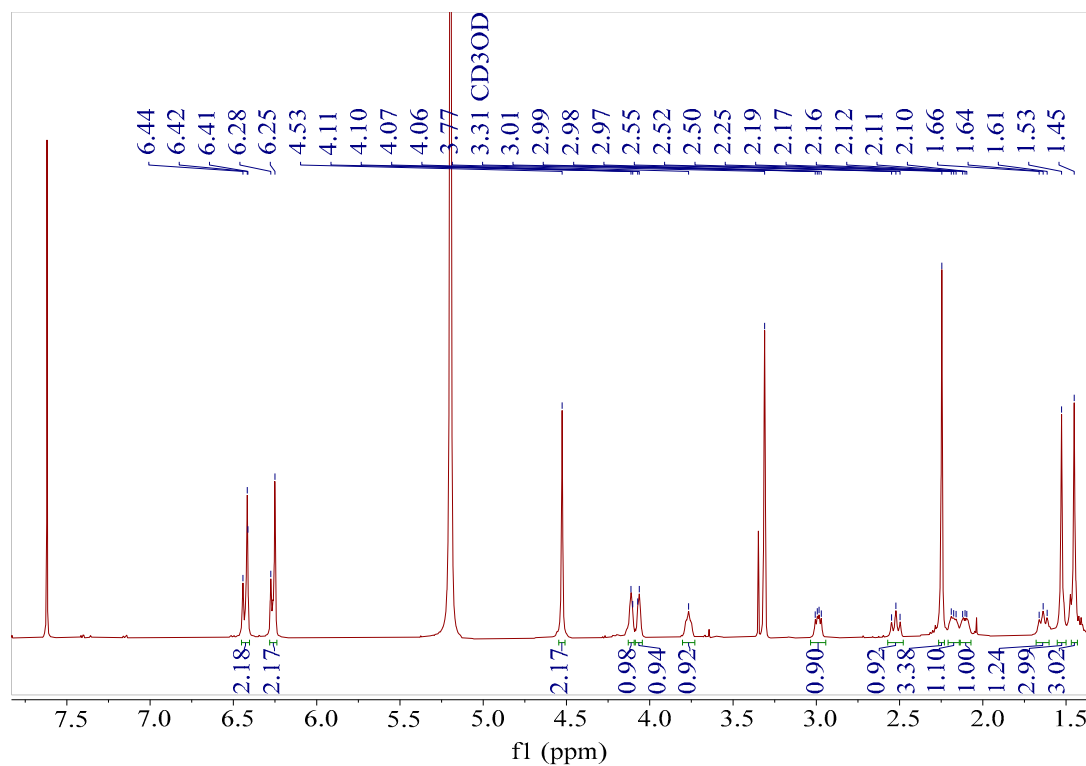

**Figure S13.** <sup>1</sup>H NMR spectrum of aflaxanthone B (2) in MeOD-*d*<sub>4</sub> and CDCl<sub>3</sub> at 500 MHz, 243K.

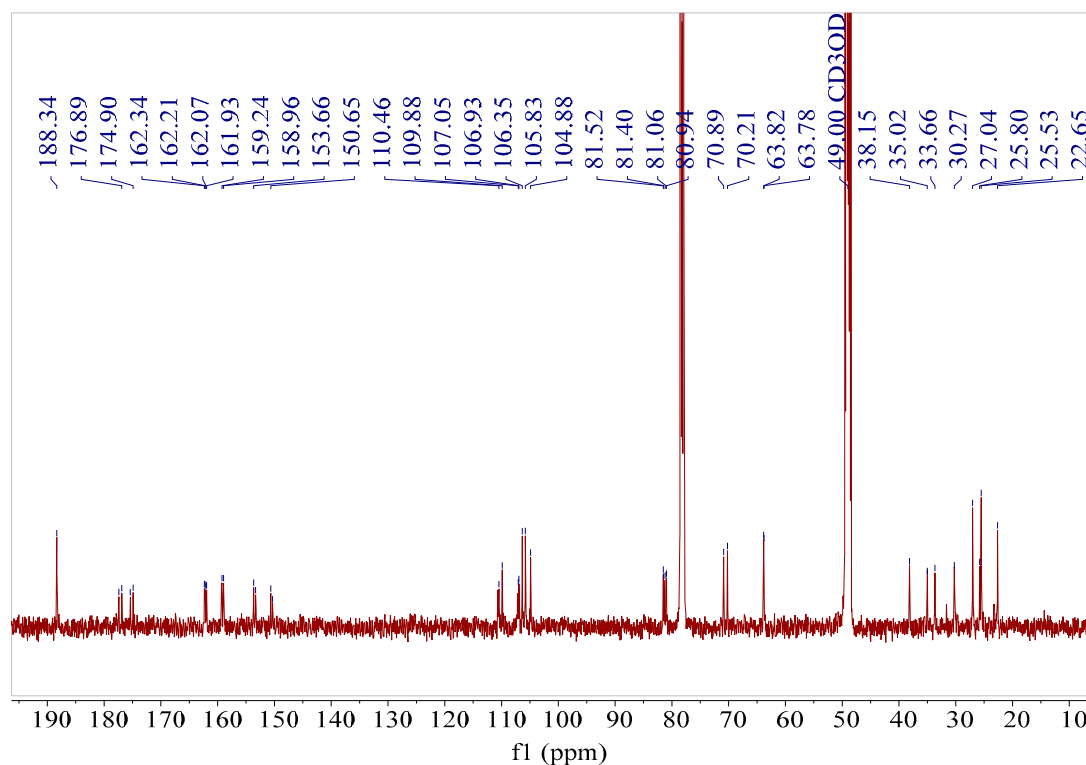

**Figure S14.** <sup>13</sup>C NMR spectrum of aflaxanthone B (2) in MeOD-*d*<sub>4</sub> and CDCl<sub>3</sub> at 125 MHz, 243K.

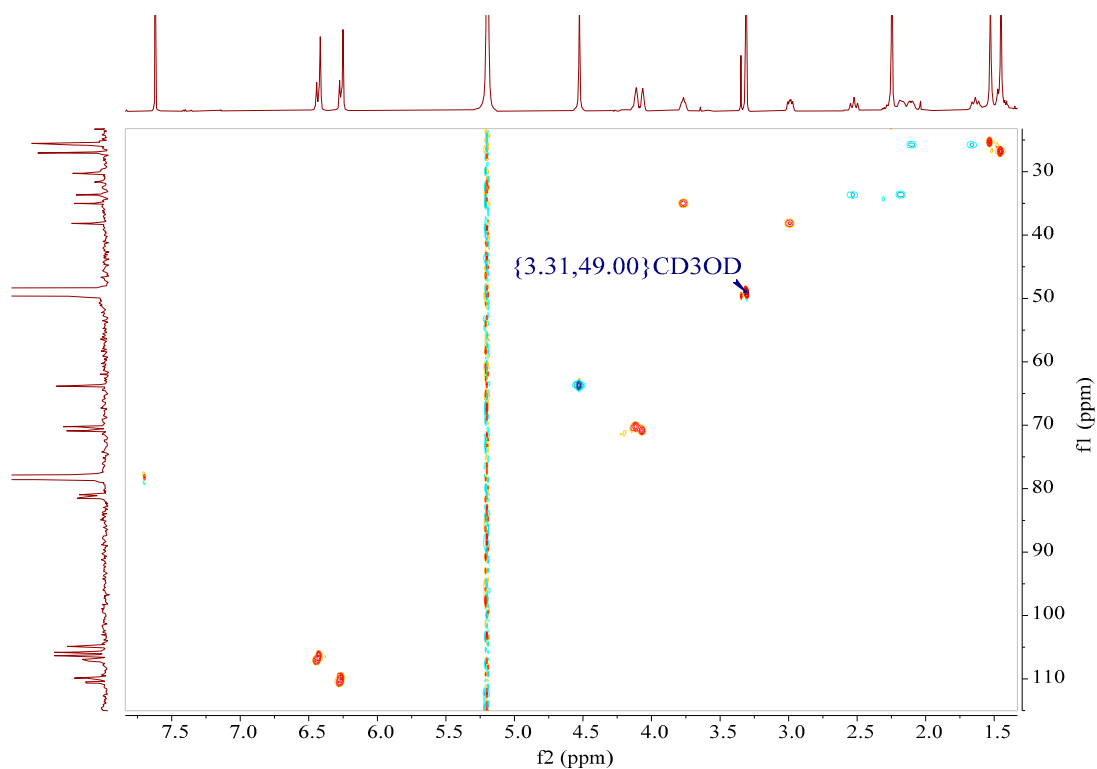

**Figure S15.** HSQC spectrum of aflaxanthone B (**2**) in MeOD-*d*<sub>4</sub> and CDCl<sub>3</sub> at 500MHz and 125 MHz, 243K.

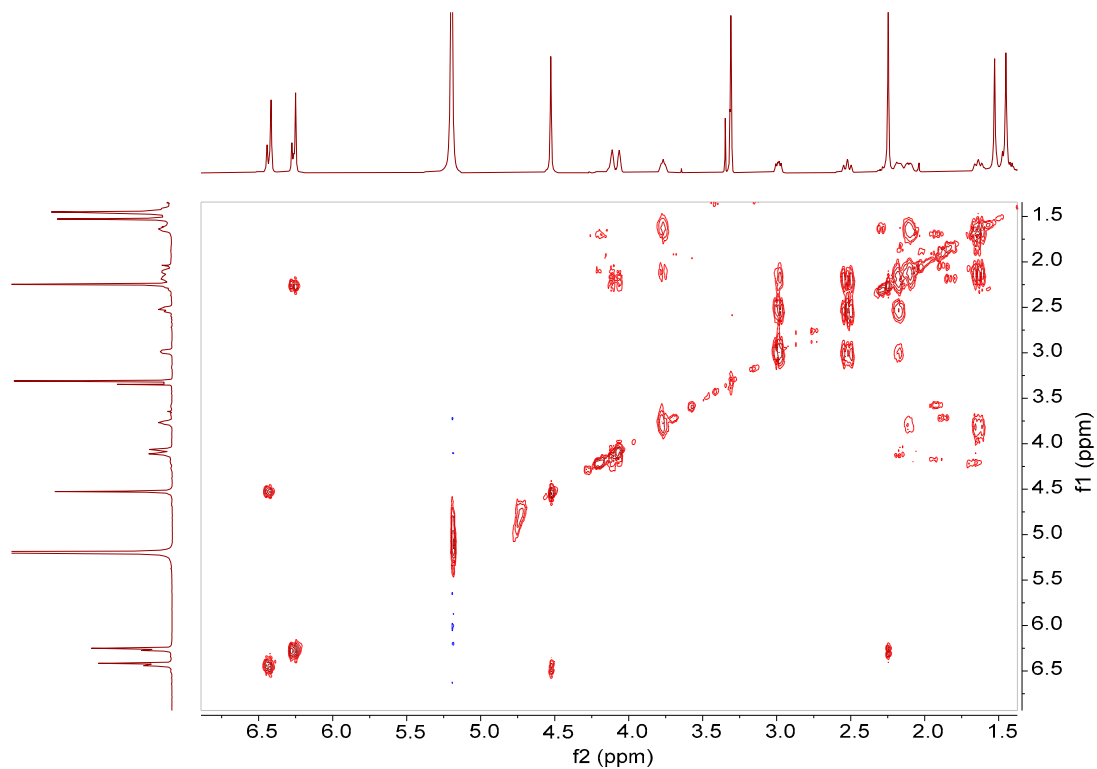

**Figure S16.** <sup>1</sup>H-<sup>1</sup>H COSY spectrum of aflaxanthone B (**2**) in MeOD-*d*<sub>4</sub> and CDCl<sub>3</sub> at 500 MHz, 243K.

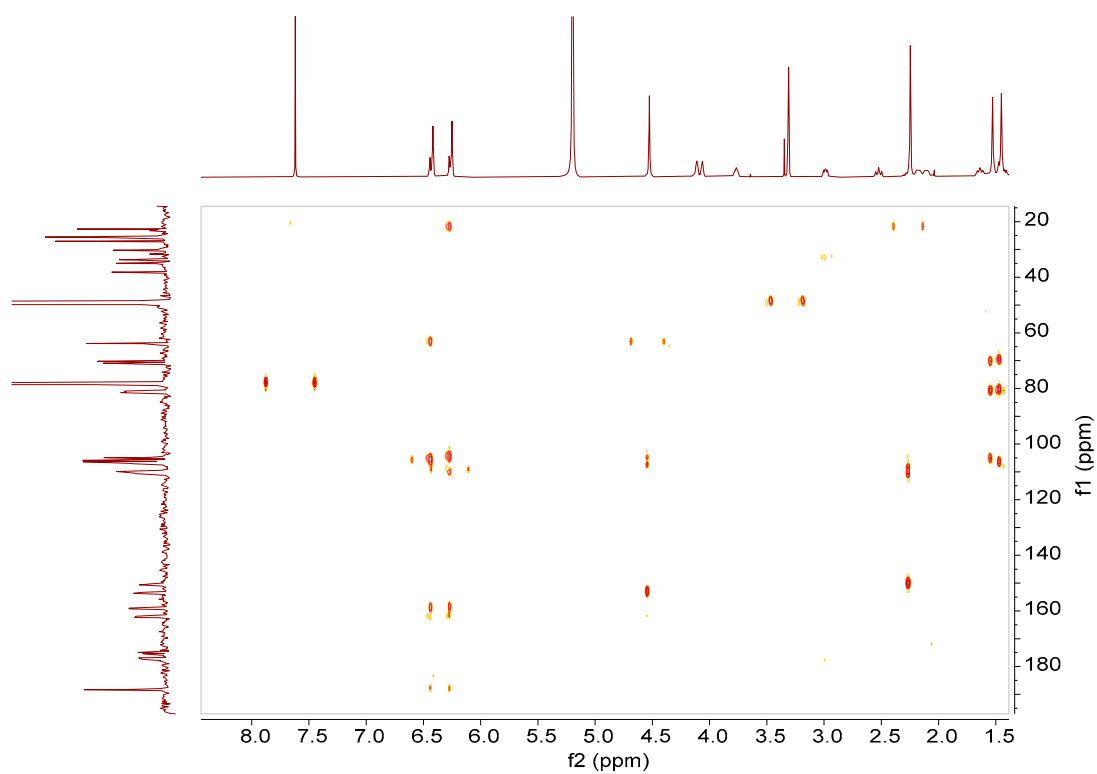

**Figure S17.** HMBC spectrum of aflaxanthone B (**2**) in MeOD-*d*<sub>4</sub> and CDCl<sub>3</sub> at 500MHz and 125 MHz, 243K.

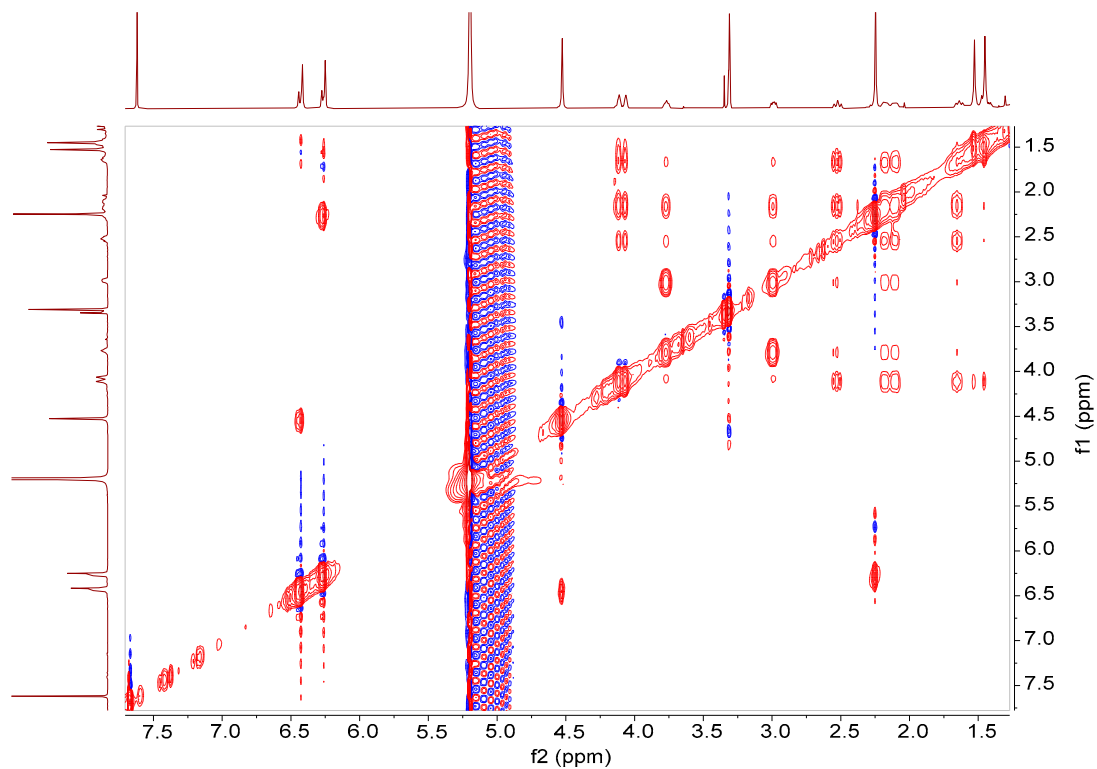

**Figure S18.** NOESY spectrum of aflaxanthone B (**2**) in MeOD-*d*<sub>4</sub> and CDCl<sub>3</sub> at 500MHz and 125 MHz, 243K.

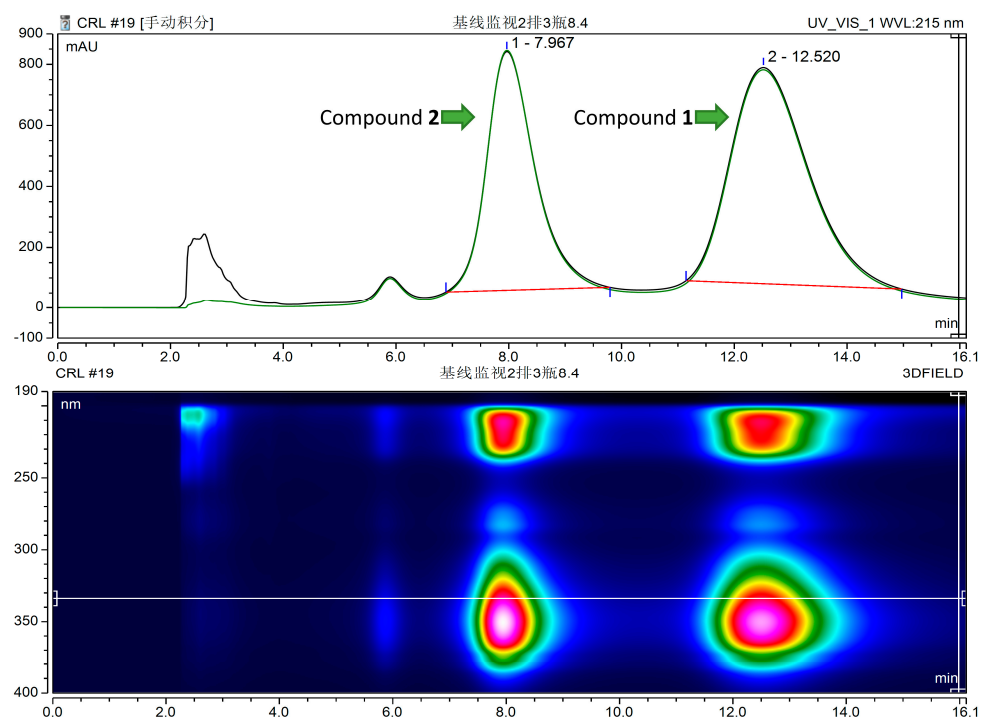

**Figure S19.** Chiral HPLC separation profile of **1** and **2**.

**Table S1.** Gibbs free energy and Boltzmann population of low energy of 5*S*,7*R*,10*aR*,5'*S*,7'*S*,10*a*'*S*-1 in CH<sub>3</sub>CN.

| Conformers of 5 <i>S</i> ,7 <i>R</i> ,10 <i>aR</i> ,5' <i>S</i> ,7' <i>S</i> ,10 <i>a</i> ' <i>S</i> -1 | $\Delta G$ (kcal/mol) | P     |
|---------------------------------------------------------------------------------------------------------|-----------------------|-------|
| 1a                                                                                                      | 0                     | 0.266 |
| 1b                                                                                                      | 0.52                  | 0.216 |
| 1c                                                                                                      | 0.62                  | 0.207 |
| 1d                                                                                                      | 2.32                  | 0.104 |
| 1e                                                                                                      | 3.38                  | 0.068 |
| 1f                                                                                                      | 3.50                  | 0.065 |
| 1g                                                                                                      | 6.44                  | 0.020 |
| 1h                                                                                                      | 6.96                  | 0.016 |
| 1i                                                                                                      | 7.01                  | 0.016 |
| 1j                                                                                                      | 7.12                  | 0.015 |

**Table S2.** Cartesian coordinates for the low-energy optimized conformer of 1a at B3LYP/6-311+g (d,p) level of theory in CH<sub>3</sub>CN.

| Conformer of 1a |      |      | Standard Orientation (Å) |           |           |
|-----------------|------|------|--------------------------|-----------|-----------|
| Number          | Atom | Type | X                        | Y         | Z         |
| 1               | 6    | 0    | 6.836900                 | -2.763597 | -0.219150 |
| 2               | 6    | 0    | 7.655909                 | -1.645137 | -0.019158 |
| 3               | 6    | 0    | 7.062497                 | -0.389368 | 0.166795  |
| 4               | 6    | 0    | 5.673525                 | -0.247430 | 0.117251  |
| 5               | 6    | 0    | 4.864602                 | -1.363147 | -0.080341 |
| 6               | 6    | 0    | 5.450526                 | -2.622572 | -0.246482 |
| 7               | 8    | 0    | 5.191647                 | 1.018512  | 0.300799  |
| 8               | 6    | 0    | 3.873174                 | 1.282584  | -0.235470 |
| 9               | 6    | 0    | 2.888530                 | 0.184734  | 0.078742  |
| 10              | 6    | 0    | 3.405454                 | -1.198271 | -0.054110 |
| 11              | 6    | 0    | 3.423812                 | 2.602042  | 0.458651  |
| 12              | 6    | 0    | 1.955429                 | 2.910965  | 0.183189  |
| 13              | 6    | 0    | 1.030577                 | 1.791545  | 0.704982  |
| 14              | 6    | 0    | 1.617877                 | 0.398039  | 0.481716  |
| 15              | 8    | 0    | 4.724796                 | -3.769330 | -0.431533 |
| 16              | 6    | 0    | 9.146127                 | -1.801349 | 0.057487  |
| 17              | 8    | 0    | 2.659419                 | -2.173443 | -0.121602 |
| 18              | 8    | 0    | 0.742061                 | -0.637694 | 0.763020  |
| 19              | 6    | 0    | 4.004765                 | 1.474184  | -1.762587 |
| 20              | 1    | 0    | 3.580723                 | 2.524269  | 1.543258  |
| 21              | 8    | 0    | 4.209582                 | 3.717092  | 0.022991  |
| 22              | 6    | 0    | -0.425197                | 2.011120  | 0.161962  |
| 23              | 1    | 0    | 1.008907                 | 1.918103  | 1.797754  |
| 24              | 6    | 0    | -0.545650                | 1.649067  | -1.340289 |
| 25              | 6    | 0    | -1.993415                | 1.458316  | -1.779646 |
| 26              | 6    | 0    | -2.729968                | 0.377992  | -0.933379 |

|    |   |   |           |           |           |
|----|---|---|-----------|-----------|-----------|
| 27 | 6 | 0 | -2.521889 | 0.639066  | 0.536468  |
| 28 | 6 | 0 | -1.497921 | 1.362382  | 1.032230  |
| 29 | 8 | 0 | -4.118440 | 0.488131  | -1.330796 |
| 30 | 6 | 0 | -5.027756 | -0.119471 | -0.512565 |
| 31 | 6 | 0 | -4.809488 | -0.361908 | 0.839512  |
| 32 | 6 | 0 | -3.547430 | 0.077577  | 1.447077  |
| 33 | 6 | 0 | -6.247179 | -0.469391 | -1.097081 |
| 34 | 6 | 0 | -7.248448 | -1.104490 | -0.346433 |
| 35 | 6 | 0 | -7.017779 | -1.344000 | 1.016019  |
| 36 | 6 | 0 | -5.809401 | -0.972617 | 1.603248  |
| 37 | 8 | 0 | -5.679896 | -1.230290 | 2.941579  |
| 38 | 8 | 0 | -3.375272 | -0.011770 | 2.661690  |
| 39 | 8 | 0 | -1.355120 | 1.633633  | 2.384753  |
| 40 | 8 | 0 | -2.659960 | 2.728472  | -1.691154 |
| 41 | 1 | 0 | -2.022753 | 1.183606  | -2.841659 |
| 42 | 6 | 0 | -2.224838 | -1.025766 | -1.323391 |
| 43 | 6 | 0 | -8.576577 | -1.466048 | -0.956666 |
| 44 | 8 | 0 | -8.417078 | -1.828784 | -2.321647 |
| 45 | 1 | 0 | -0.633735 | 3.089603  | 0.239846  |
| 46 | 1 | 0 | 7.272638  | -3.752355 | -0.344767 |
| 47 | 1 | 0 | 7.683563  | 0.486077  | 0.343844  |
| 48 | 1 | 0 | 1.687642  | 3.861390  | 0.663541  |
| 49 | 1 | 0 | 1.811634  | 3.088304  | -0.887831 |
| 50 | 1 | 0 | 3.770288  | -3.543646 | -0.371687 |
| 51 | 1 | 0 | 9.485098  | -2.628206 | -0.576159 |
| 52 | 1 | 0 | 9.652222  | -0.896189 | -0.293003 |
| 53 | 1 | 0 | 9.448125  | -1.999801 | 1.090321  |
| 54 | 1 | 0 | 1.180415  | -1.494395 | 0.564642  |
| 55 | 1 | 0 | 4.753681  | 2.237880  | -2.001784 |
| 56 | 1 | 0 | 4.346601  | 0.558078  | -2.258336 |
| 57 | 1 | 0 | 3.056228  | 1.758473  | -2.228199 |
| 58 | 1 | 0 | 5.136473  | 3.505217  | 0.243446  |
| 59 | 1 | 0 | 0.020620  | 0.743025  | -1.578567 |
| 60 | 1 | 0 | -0.098817 | 2.458302  | -1.931295 |
| 61 | 1 | 0 | -6.414081 | -0.261441 | -2.153066 |
| 62 | 1 | 0 | -7.780733 | -1.815059 | 1.631867  |
| 63 | 1 | 0 | -4.813019 | -0.873963 | 3.238993  |
| 64 | 1 | 0 | -2.004366 | 1.088412  | 2.882514  |
| 65 | 1 | 0 | -3.612036 | 2.546121  | -1.803942 |
| 66 | 1 | 0 | -2.767745 | -1.814939 | -0.791590 |
| 67 | 1 | 0 | -2.389176 | -1.210227 | -2.391658 |
| 68 | 1 | 0 | -1.160361 | -1.161624 | -1.112165 |
| 69 | 1 | 0 | -9.256718 | -0.611350 | -0.893288 |

|    |   |   |           |           |           |
|----|---|---|-----------|-----------|-----------|
| 70 | 1 | 0 | -9.020557 | -2.320225 | -0.433792 |
| 71 | 1 | 0 | -9.295273 | -2.089997 | -2.643541 |

**Table S3.** Cartesian coordinates for the low-energy optimized conformer of **1b** at B3LYP/6-311+g (d,p) level of theory in CH<sub>3</sub>CN.

| Conformer of <b>1b</b> |      |      | Standard Orientation (Å) |           |           |
|------------------------|------|------|--------------------------|-----------|-----------|
| Number                 | Atom | Type | X                        | Y         | Z         |
| 1                      | 6    | 0    | 6.912036                 | -2.656698 | -0.386926 |
| 2                      | 6    | 0    | 7.706833                 | -1.544110 | -0.089158 |
| 3                      | 6    | 0    | 7.087502                 | -0.316818 | 0.188486  |
| 4                      | 6    | 0    | 5.697414                 | -0.196476 | 0.131170  |
| 5                      | 6    | 0    | 4.911920                 | -1.308254 | -0.162882 |
| 6                      | 6    | 0    | 5.523119                 | -2.539433 | -0.420936 |
| 7                      | 8    | 0    | 5.188685                 | 1.041100  | 0.408217  |
| 8                      | 6    | 0    | 3.872207                 | 1.323850  | -0.122862 |
| 9                      | 6    | 0    | 2.905431                 | 0.186967  | 0.092497  |
| 10                     | 6    | 0    | 3.449693                 | -1.172202 | -0.143398 |
| 11                     | 6    | 0    | 3.389796                 | 2.575954  | 0.666203  |
| 12                     | 6    | 0    | 1.919271                 | 2.878761  | 0.398291  |
| 13                     | 6    | 0    | 1.010143                 | 1.705044  | 0.819954  |
| 14                     | 6    | 0    | 1.625864                 | 0.344002  | 0.494103  |
| 15                     | 8    | 0    | 4.822034                 | -3.680694 | -0.705663 |
| 16                     | 6    | 0    | 9.199051                 | -1.678786 | -0.006131 |
| 17                     | 8    | 0    | 2.722962                 | -2.151687 | -0.297167 |
| 18                     | 8    | 0    | 0.766873                 | -0.725904 | 0.681223  |
| 19                     | 6    | 0    | 4.017586                 | 1.636914  | -1.628406 |
| 20                     | 1    | 0    | 3.536788                 | 2.417104  | 1.743359  |
| 21                     | 8    | 0    | 4.158331                 | 3.736249  | 0.328442  |
| 22                     | 6    | 0    | -0.444259                | 1.939655  | 0.279197  |
| 23                     | 1    | 0    | 0.975613                 | 1.744988  | 1.918549  |
| 24                     | 6    | 0    | -0.542648                | 1.696386  | -1.248100 |
| 25                     | 6    | 0    | -1.982807                | 1.512138  | -1.717891 |
| 26                     | 6    | 0    | -2.704999                | 0.353469  | -0.967925 |
| 27                     | 6    | 0    | -2.517793                | 0.502183  | 0.520707  |
| 28                     | 6    | 0    | -1.512346                | 1.203984  | 1.083588  |
| 29                     | 8    | 0    | -4.091335                | 0.464245  | -1.373820 |
| 30                     | 6    | 0    | -4.999129                | -0.214527 | -0.611206 |
| 31                     | 6    | 0    | -4.789126                | -0.557541 | 0.720278  |
| 32                     | 6    | 0    | -3.538864                | -0.148255 | 1.373168  |
| 33                     | 6    | 0    | -6.208272                | -0.532700 | -1.232417 |
| 34                     | 6    | 0    | -7.209219                | -1.226876 | -0.535465 |
| 35                     | 6    | 0    | -6.986588                | -1.579652 | 0.801518  |
| 36                     | 6    | 0    | -5.786773                | -1.239780 | 1.425206  |



|    |   |   |           |           |           |
|----|---|---|-----------|-----------|-----------|
| 37 | 8 | 0 | -5.662535 | -1.602198 | 2.739344  |
| 38 | 8 | 0 | -3.375403 | -0.333834 | 2.578552  |
| 39 | 8 | 0 | -1.388993 | 1.370644  | 2.453924  |
| 40 | 8 | 0 | -2.674675 | 2.757270  | -1.536236 |
| 41 | 1 | 0 | -1.995326 | 1.321465  | -2.797987 |
| 42 | 6 | 0 | -2.165909 | -1.004615 | -1.459707 |
| 43 | 6 | 0 | -8.506582 | -1.566507 | -1.216949 |
| 44 | 8 | 0 | -9.236065 | -0.381372 | -1.499157 |
| 45 | 1 | 0 | -0.674684 | 3.004697  | 0.439911  |
| 46 | 1 | 0 | 7.367485  | -3.624766 | -0.585276 |
| 47 | 1 | 0 | 7.690071  | 0.552225  | 0.441695  |
| 48 | 1 | 0 | 1.627466  | 3.784007  | 0.946938  |
| 49 | 1 | 0 | 1.782905  | 3.136309  | -0.658082 |
| 50 | 1 | 0 | 3.863375  | -3.478151 | -0.639981 |
| 51 | 1 | 0 | 9.560913  | -2.446128 | -0.697257 |
| 52 | 1 | 0 | 9.691466  | -0.738948 | -0.276831 |
| 53 | 1 | 0 | 9.493352  | -1.952149 | 1.012452  |
| 54 | 1 | 0 | 1.225703  | -1.555507 | 0.424315  |
| 55 | 1 | 0 | 4.754322  | 2.429941  | -1.797895 |
| 56 | 1 | 0 | 4.382146  | 0.768746  | -2.189931 |
| 57 | 1 | 0 | 3.069132  | 1.939828  | -2.083028 |
| 58 | 1 | 0 | 5.085794  | 3.525588  | 0.544219  |
| 59 | 1 | 0 | 0.044237  | 0.823208  | -1.551829 |
| 60 | 1 | 0 | -0.106673 | 2.558094  | -1.767942 |
| 61 | 1 | 0 | -6.374556 | -0.243108 | -2.269581 |
| 62 | 1 | 0 | -7.746719 | -2.110098 | 1.370684  |
| 63 | 1 | 0 | -4.803930 | -1.257958 | 3.074142  |
| 64 | 1 | 0 | -2.028295 | 0.774274  | 2.900995  |
| 65 | 1 | 0 | -3.621402 | 2.570857  | -1.683993 |
| 66 | 1 | 0 | -2.699632 | -1.844141 | -0.998443 |
| 67 | 1 | 0 | -2.315727 | -1.107865 | -2.540490 |
| 68 | 1 | 0 | -1.102167 | -1.136112 | -1.245774 |
| 69 | 1 | 0 | -9.130806 | -2.210066 | -0.588760 |
| 70 | 1 | 0 | -8.318833 | -2.099056 | -2.154721 |
| 71 | 1 | 0 | -9.066359 | 0.245689  | -0.774762 |

**Table S4.** Cartesian coordinates for the low-energy optimized conformer of **1c** at B3LYP/6-311+g (d,p) level of theory in CH<sub>3</sub>CN.

| Conformer of <b>1c</b> |      |      | Standard Orientation (Å) |           |           |
|------------------------|------|------|--------------------------|-----------|-----------|
| Number                 | Atom | Type | X                        | Y         | Z         |
| 1                      | 6    | 0    | 6.810195                 | -2.794750 | -0.176221 |
| 2                      | 6    | 0    | 7.636233                 | -1.682886 | 0.025192  |
| 3                      | 6    | 0    | 7.050819                 | -0.421907 | 0.201831  |

|    |   |   |           |           |           |
|----|---|---|-----------|-----------|-----------|
| 4  | 6 | 0 | 5.663856  | -0.268979 | 0.140222  |
| 5  | 6 | 0 | 4.847960  | -1.379274 | -0.056756 |
| 6  | 6 | 0 | 5.425327  | -2.644273 | -0.213343 |
| 7  | 8 | 0 | 5.189315  | 1.000805  | 0.314298  |
| 8  | 6 | 0 | 3.878226  | 1.273021  | -0.232045 |
| 9  | 6 | 0 | 2.882496  | 0.184496  | 0.080120  |
| 10 | 6 | 0 | 3.390254  | -1.203426 | -0.042918 |
| 11 | 6 | 0 | 3.432470  | 2.599236  | 0.451330  |
| 12 | 6 | 0 | 1.968598  | 2.917698  | 0.164333  |
| 13 | 6 | 0 | 1.033180  | 1.807284  | 0.686120  |
| 14 | 6 | 0 | 1.610406  | 0.408767  | 0.472888  |
| 15 | 8 | 0 | 4.693227  | -3.785522 | -0.399355 |
| 16 | 6 | 0 | 9.124717  | -1.848949 | 0.113838  |
| 17 | 8 | 0 | 2.636696  | -2.173291 | -0.111922 |
| 18 | 8 | 0 | 0.725088  | -0.618646 | 0.752197  |
| 19 | 6 | 0 | 4.022278  | 1.455979  | -1.760235 |
| 20 | 1 | 0 | 3.582003  | 2.526966  | 1.536795  |
| 21 | 8 | 0 | 4.229595  | 3.707084  | 0.015161  |
| 22 | 6 | 0 | -0.419225 | 2.035129  | 0.133216  |
| 23 | 1 | 0 | 1.005603  | 1.940449  | 1.777051  |
| 24 | 6 | 0 | -0.531759 | 1.667817  | -1.367832 |
| 25 | 6 | 0 | -1.979701 | 1.483339  | -1.815587 |
| 26 | 6 | 0 | -2.727455 | 0.412492  | -0.968286 |
| 27 | 6 | 0 | -2.526839 | 0.679262  | 0.501477  |
| 28 | 6 | 0 | -1.499889 | 1.398283  | 1.000596  |
| 29 | 8 | 0 | -4.112281 | 0.524828  | -1.376941 |
| 30 | 6 | 0 | -5.033935 | -0.060891 | -0.557133 |
| 31 | 6 | 0 | -4.824479 | -0.298995 | 0.797861  |
| 32 | 6 | 0 | -3.560684 | 0.128755  | 1.409841  |
| 33 | 6 | 0 | -6.255517 | -0.398634 | -1.144600 |
| 34 | 6 | 0 | -7.272013 | -0.998474 | -0.386780 |
| 35 | 6 | 0 | -7.045643 | -1.254701 | 0.972017  |
| 36 | 6 | 0 | -5.834394 | -0.897787 | 1.560328  |
| 37 | 8 | 0 | -5.707615 | -1.161748 | 2.896858  |
| 38 | 8 | 0 | -3.393704 | 0.037674  | 2.624410  |
| 39 | 8 | 0 | -1.364351 | 1.673908  | 2.351564  |
| 40 | 8 | 0 | -2.636995 | 2.758617  | -1.735993 |
| 41 | 1 | 0 | -2.004549 | 1.204655  | -2.875640 |
| 42 | 6 | 0 | -2.227063 | -0.996706 | -1.347697 |
| 43 | 6 | 0 | -8.574298 | -1.378255 | -1.037055 |
| 44 | 8 | 0 | -8.376243 | -2.474971 | -1.917405 |
| 45 | 1 | 0 | -0.619110 | 3.115378  | 0.205922  |
| 46 | 1 | 0 | 7.239728  | -3.787520 | -0.294125 |

|    |   |   |           |           |           |
|----|---|---|-----------|-----------|-----------|
| 47 | 1 | 0 | 7.677599  | 0.450772  | 0.378910  |
| 48 | 1 | 0 | 1.704652  | 3.872940  | 0.637246  |
| 49 | 1 | 0 | 1.833766  | 3.090261  | -0.909041 |
| 50 | 1 | 0 | 3.739791  | -3.553359 | -0.346503 |
| 51 | 1 | 0 | 9.462104  | -2.681525 | -0.512920 |
| 52 | 1 | 0 | 9.639968  | -0.948491 | -0.236601 |
| 53 | 1 | 0 | 9.417948  | -2.044708 | 1.149731  |
| 54 | 1 | 0 | 1.159732  | -1.479165 | 0.563664  |
| 55 | 1 | 0 | 4.779011  | 2.212150  | -1.997707 |
| 56 | 1 | 0 | 4.360391  | 0.534460  | -2.248738 |
| 57 | 1 | 0 | 3.079211  | 1.744623  | -2.234537 |
| 58 | 1 | 0 | 5.152629  | 3.489886  | 0.243253  |
| 59 | 1 | 0 | 0.028564  | 0.757612  | -1.600070 |
| 60 | 1 | 0 | -0.076792 | 2.471535  | -1.959294 |
| 61 | 1 | 0 | -6.414895 | -0.202305 | -2.204061 |
| 62 | 1 | 0 | -7.814360 | -1.722284 | 1.584943  |
| 63 | 1 | 0 | -4.841649 | -0.807937 | 3.200359  |
| 64 | 1 | 0 | -2.017199 | 1.135141  | 2.849352  |
| 65 | 1 | 0 | -3.589910 | 2.585015  | -1.859478 |
| 66 | 1 | 0 | -2.779951 | -1.779064 | -0.815837 |
| 67 | 1 | 0 | -2.385730 | -1.185256 | -2.415656 |
| 68 | 1 | 0 | -1.165851 | -1.138467 | -1.127226 |
| 69 | 1 | 0 | -8.980120 | -0.535132 | -1.605752 |
| 70 | 1 | 0 | -9.323177 | -1.666387 | -0.291674 |
| 71 | 1 | 0 | -7.695988 | -3.046159 | -1.523676 |

**Table S5.** Cartesian coordinates for the low-energy optimized conformer of **1d** at B3LYP/6-311+g (d,p) level of theory in CH<sub>3</sub>CN.

| Conformer of <b>1d</b> |      |      | Standard Orientation (Å) |           |           |
|------------------------|------|------|--------------------------|-----------|-----------|
| Number                 | Atom | Type | X                        | Y         | Z         |
| 1                      | 6    | 0    | -7.402831                | -1.581902 | -0.819087 |
| 2                      | 6    | 0    | -7.586386                | -1.438501 | 0.561329  |
| 3                      | 6    | 0    | -6.601578                | -0.787504 | 1.315850  |
| 4                      | 6    | 0    | -5.433616                | -0.321654 | 0.707600  |
| 5                      | 6    | 0    | -5.256912                | -0.466503 | -0.665402 |
| 6                      | 6    | 0    | -6.246944                | -1.095282 | -1.428235 |
| 7                      | 8    | 0    | -4.532369                | 0.297225  | 1.525651  |
| 8                      | 6    | 0    | -3.155033                | 0.301671  | 1.070654  |
| 9                      | 6    | 0    | -3.026775                | 0.661317  | -0.386953 |
| 10                     | 6    | 0    | -4.055858                | 0.097510  | -1.292418 |
| 11                     | 6    | 0    | -2.477627                | 1.410030  | 1.928005  |
| 12                     | 6    | 0    | -1.051359                | 1.699035  | 1.472113  |
| 13                     | 6    | 0    | -0.983483                | 2.115677  | -0.013433 |

|    |   |   |           |           |           |
|----|---|---|-----------|-----------|-----------|
| 14 | 6 | 0 | -2.068158 | 1.476936  | -0.874305 |
| 15 | 8 | 0 | -6.157214 | -1.261527 | -2.784626 |
| 16 | 6 | 0 | -8.849969 | -1.919073 | 1.211874  |
| 17 | 8 | 0 | -3.934217 | 0.104375  | -2.516172 |
| 18 | 8 | 0 | -2.012824 | 1.856726  | -2.204910 |
| 19 | 6 | 0 | -2.556949 | -1.088624 | 1.368206  |
| 20 | 1 | 0 | -3.067321 | 2.334479  | 1.869305  |
| 21 | 8 | 0 | -2.441345 | 1.056377  | 3.317086  |
| 22 | 6 | 0 | 0.463160  | 1.952691  | -0.607045 |
| 23 | 1 | 0 | -1.218493 | 3.191850  | -0.040877 |
| 24 | 6 | 0 | 1.385751  | 3.054895  | -0.031213 |
| 25 | 6 | 0 | 2.861765  | 2.780587  | -0.307039 |
| 26 | 6 | 0 | 3.316220  | 1.412021  | 0.278819  |
| 27 | 6 | 0 | 2.342797  | 0.326745  | -0.105983 |
| 28 | 6 | 0 | 1.065459  | 0.553352  | -0.481904 |
| 29 | 8 | 0 | 4.641142  | 1.197743  | -0.259519 |
| 30 | 6 | 0 | 5.134285  | -0.071669 | -0.155915 |
| 31 | 6 | 0 | 4.336199  | -1.206265 | -0.045718 |
| 32 | 6 | 0 | 2.875982  | -1.055942 | -0.071672 |
| 33 | 6 | 0 | 6.524824  | -0.197905 | -0.199357 |
| 34 | 6 | 0 | 7.135946  | -1.456818 | -0.092045 |
| 35 | 6 | 0 | 6.322967  | -2.593451 | 0.020987  |
| 36 | 6 | 0 | 4.935011  | -2.467805 | 0.040533  |
| 37 | 8 | 0 | 4.220828  | -3.632530 | 0.137403  |
| 38 | 8 | 0 | 2.141927  | -2.043633 | -0.079708 |
| 39 | 8 | 0 | 0.197668  | -0.470187 | -0.823664 |
| 40 | 8 | 0 | 3.074958  | 2.832413  | -1.725518 |
| 41 | 1 | 0 | 3.472163  | 3.589268  | 0.113679  |
| 42 | 6 | 0 | 3.423077  | 1.517946  | 1.814805  |
| 43 | 6 | 0 | 8.632500  | -1.608057 | -0.159481 |
| 44 | 8 | 0 | 9.272164  | -0.500642 | 0.460752  |
| 45 | 1 | 0 | 0.405877  | 2.145168  | -1.688499 |
| 46 | 1 | 0 | -8.162508 | -2.063513 | -1.431749 |
| 47 | 1 | 0 | -6.737995 | -0.648588 | 2.386095  |
| 48 | 1 | 0 | -0.634316 | 2.496016  | 2.102219  |
| 49 | 1 | 0 | -0.422568 | 0.827005  | 1.681852  |
| 50 | 1 | 0 | -5.330482 | -0.826019 | -3.092593 |
| 51 | 1 | 0 | -9.249011 | -2.796044 | 0.690145  |
| 52 | 1 | 0 | -8.665518 | -2.215694 | 2.250221  |
| 53 | 1 | 0 | -9.603118 | -1.125691 | 1.198539  |
| 54 | 1 | 0 | -2.626501 | 1.288040  | -2.720166 |
| 55 | 1 | 0 | -2.728535 | -1.375570 | 2.411510  |
| 56 | 1 | 0 | -3.029857 | -1.869728 | 0.760795  |

|    |   |   |           |           |           |
|----|---|---|-----------|-----------|-----------|
| 57 | 1 | 0 | -1.482681 | -1.131993 | 1.171429  |
| 58 | 1 | 0 | -3.361525 | 0.853445  | 3.570374  |
| 59 | 1 | 0 | 1.237208  | 3.170664  | 1.047583  |
| 60 | 1 | 0 | 1.102245  | 4.011419  | -0.488063 |
| 61 | 1 | 0 | 7.141443  | 0.693505  | -0.301118 |
| 62 | 1 | 0 | 6.763299  | -3.586401 | 0.086362  |
| 63 | 1 | 0 | 3.264574  | -3.411842 | 0.086445  |
| 64 | 1 | 0 | 0.652635  | -1.331338 | -0.697436 |
| 65 | 1 | 0 | 3.974128  | 2.487558  | -1.883483 |
| 66 | 1 | 0 | 3.831033  | 0.602965  | 2.259353  |
| 67 | 1 | 0 | 4.109997  | 2.323780  | 2.098231  |
| 68 | 1 | 0 | 2.453812  | 1.706803  | 2.288646  |
| 69 | 1 | 0 | 8.950295  | -1.662523 | -1.205587 |
| 70 | 1 | 0 | 8.953318  | -2.515931 | 0.362936  |
| 71 | 1 | 0 | 10.227855 | -0.672542 | 0.418210  |

**Table S6.** Cartesian coordinates for the low-energy optimized conformer of **1e** at B3LYP/6-311+g (d,p) level of theory in CH<sub>3</sub>CN.

| Conformer of <b>1e</b> |      |      | Standard Orientation (Å) |           |           |
|------------------------|------|------|--------------------------|-----------|-----------|
| Number                 | Atom | Type | X                        | Y         | Z         |
| 1                      | 6    | 0    | 7.362176                 | -1.669221 | 0.851049  |
| 2                      | 6    | 0    | 7.580768                 | -1.450893 | -0.515154 |
| 3                      | 6    | 0    | 6.619655                 | -0.750322 | -1.255845 |
| 4                      | 6    | 0    | 5.440008                 | -0.309944 | -0.650167 |
| 5                      | 6    | 0    | 5.228872                 | -0.529598 | 0.707513  |
| 6                      | 6    | 0    | 6.195123                 | -1.208345 | 1.458220  |
| 7                      | 8    | 0    | 4.563059                 | 0.361928  | -1.454378 |
| 8                      | 6    | 0    | 3.175807                 | 0.351325  | -1.033211 |
| 9                      | 6    | 0    | 3.013798                 | 0.631146  | 0.438595  |
| 10                     | 6    | 0    | 4.015748                 | 0.007457  | 1.335972  |
| 11                     | 6    | 0    | 2.527298                 | 1.511889  | -1.843522 |
| 12                     | 6    | 0    | 1.091948                 | 1.787705  | -1.406345 |
| 13                     | 6    | 0    | 0.991035                 | 2.122095  | 0.097625  |
| 14                     | 6    | 0    | 2.049529                 | 1.425546  | 0.947630  |
| 15                     | 8    | 0    | 6.069258                 | -1.450360 | 2.799407  |
| 16                     | 6    | 0    | 8.857039                 | -1.904548 | -1.160250 |
| 17                     | 8    | 0    | 3.862899                 | -0.053488 | 2.554748  |
| 18                     | 8    | 0    | 1.963041                 | 1.730025  | 2.295706  |
| 19                     | 6    | 0    | 2.575454                 | -1.014833 | -1.421910 |
| 20                     | 1    | 0    | 3.122124                 | 2.426317  | -1.719623 |
| 21                     | 8    | 0    | 2.521535                 | 1.236434  | -3.249944 |
| 22                     | 6    | 0    | -0.469969                | 1.939842  | 0.647002  |
| 23                     | 1    | 0    | 1.234145                 | 3.192048  | 0.191293  |

|    |   |   |           |           |           |
|----|---|---|-----------|-----------|-----------|
| 24 | 6 | 0 | -1.369788 | 3.081808  | 0.111100  |
| 25 | 6 | 0 | -2.854680 | 2.807994  | 0.336470  |
| 26 | 6 | 0 | -3.305751 | 1.479019  | -0.335949 |
| 27 | 6 | 0 | -2.351804 | 0.363999  | 0.010222  |
| 28 | 6 | 0 | -1.081955 | 0.556203  | 0.427771  |
| 29 | 8 | 0 | -4.647496 | 1.248238  | 0.153541  |
| 30 | 6 | 0 | -5.147339 | -0.010171 | -0.020987 |
| 31 | 6 | 0 | -4.355551 | -1.145143 | -0.175971 |
| 32 | 6 | 0 | -2.895373 | -1.009330 | -0.114512 |
| 33 | 6 | 0 | -6.539160 | -0.126364 | -0.008106 |
| 34 | 6 | 0 | -7.154620 | -1.376174 | -0.180691 |
| 35 | 6 | 0 | -6.351890 | -2.511381 | -0.349063 |
| 36 | 6 | 0 | -4.962551 | -2.395526 | -0.340364 |
| 37 | 8 | 0 | -4.256044 | -3.557861 | -0.490016 |
| 38 | 8 | 0 | -2.170583 | -2.003124 | -0.150155 |
| 39 | 8 | 0 | -0.231136 | -0.493306 | 0.732432  |
| 40 | 8 | 0 | -3.101442 | 2.781357  | 1.749333  |
| 41 | 1 | 0 | -3.447317 | 3.644350  | -0.053048 |
| 42 | 6 | 0 | -3.372025 | 1.670502  | -1.867030 |
| 43 | 6 | 0 | -8.655197 | -1.486594 | -0.170219 |
| 44 | 8 | 0 | -9.160895 | -1.145796 | 1.112415  |
| 45 | 1 | 0 | -0.439215 | 2.071199  | 1.737645  |
| 46 | 1 | 0 | 8.103630  | -2.190905 | 1.453529  |
| 47 | 1 | 0 | 6.783693  | -0.552323 | -2.312525 |
| 48 | 1 | 0 | 0.696290  | 2.621113  | -1.999938 |
| 49 | 1 | 0 | 0.462570  | 0.933516  | -1.679423 |
| 50 | 1 | 0 | 5.239458  | -1.025864 | 3.111721  |
| 51 | 1 | 0 | 9.614689  | -1.118772 | -1.082382 |
| 52 | 1 | 0 | 9.236327  | -2.811749 | -0.679425 |
| 53 | 1 | 0 | 8.697529  | -2.139692 | -2.217377 |
| 54 | 1 | 0 | 2.561081  | 1.129143  | 2.792685  |
| 55 | 1 | 0 | 1.496109  | -1.060042 | -1.254555 |
| 56 | 1 | 0 | 2.770292  | -1.244458 | -2.476376 |
| 57 | 1 | 0 | 3.028645  | -1.832235 | -0.848881 |
| 58 | 1 | 0 | 3.446311  | 1.041220  | -3.493154 |
| 59 | 1 | 0 | -1.193752 | 3.256207  | -0.955228 |
| 60 | 1 | 0 | -1.088731 | 4.008382  | 0.629022  |
| 61 | 1 | 0 | -7.152715 | 0.762005  | 0.132095  |
| 62 | 1 | 0 | -6.799003 | -3.494331 | -0.478918 |
| 63 | 1 | 0 | -3.298879 | -3.351384 | -0.409218 |
| 64 | 1 | 0 | -0.688612 | -1.342044 | 0.545288  |
| 65 | 1 | 0 | -4.010948 | 2.448278  | 1.868133  |
| 66 | 1 | 0 | -3.778543 | 0.786293  | -2.370360 |

|    |   |   |           |           |           |
|----|---|---|-----------|-----------|-----------|
| 67 | 1 | 0 | -4.043179 | 2.498911  | -2.121963 |
| 68 | 1 | 0 | -2.389671 | 1.872999  | -2.304790 |
| 69 | 1 | 0 | -8.981550 | -2.504233 | -0.406558 |
| 70 | 1 | 0 | -9.092337 | -0.813335 | -0.914555 |
| 71 | 1 | 0 | -8.525637 | -1.471851 | 1.772937  |

**Table S7.** Cartesian coordinates for the low-energy optimized conformer of **1f** at B3LYP/6-311+g (d,p) level of theory in CH<sub>3</sub>CN.

| Conformer of <b>1f</b> |      |      | Standard Orientation (Å) |           |           |
|------------------------|------|------|--------------------------|-----------|-----------|
| Number                 | Atom | Type | X                        | Y         | Z         |
| 1                      | 6    | 0    | -7.392929                | -1.594754 | -0.821999 |
| 2                      | 6    | 0    | -7.567762                | -1.483609 | 0.563837  |
| 3                      | 6    | 0    | -6.581414                | -0.843733 | 1.325640  |
| 4                      | 6    | 0    | -5.421062                | -0.358271 | 0.720261  |
| 5                      | 6    | 0    | -5.252970                | -0.471425 | -0.656546 |
| 6                      | 6    | 0    | -6.244377                | -1.088709 | -1.427064 |
| 7                      | 8    | 0    | -4.516879                | 0.247375  | 1.545893  |
| 8                      | 6    | 0    | -3.143480                | 0.269515  | 1.082597  |
| 9                      | 6    | 0    | -3.026915                | 0.662832  | -0.366555 |
| 10                     | 6    | 0    | -4.058059                | 0.113588  | -1.278637 |
| 11                     | 6    | 0    | -2.465781                | 1.362561  | 1.960292  |
| 12                     | 6    | 0    | -1.045183                | 1.671475  | 1.501174  |
| 13                     | 6    | 0    | -0.990146                | 2.122482  | 0.025018  |
| 14                     | 6    | 0    | -2.076118                | 1.495304  | -0.842017 |
| 15                     | 8    | 0    | -6.161358                | -1.224518 | -2.786599 |
| 16                     | 6    | 0    | -8.824255                | -1.985856 | 1.210655  |
| 17                     | 8    | 0    | -3.943839                | 0.148048  | -2.502417 |
| 18                     | 8    | 0    | -2.031216                | 1.904791  | -2.164966 |
| 19                     | 6    | 0    | -2.535313                | -1.123800 | 1.344192  |
| 20                     | 1    | 0    | -3.062770                | 2.284766  | 1.927445  |
| 21                     | 8    | 0    | -2.417048                | 0.977896  | 3.340742  |
| 22                     | 6    | 0    | 0.452706                 | 1.983012  | -0.582012 |
| 23                     | 1    | 0    | -1.232505                | 3.196364  | 0.023479  |
| 24                     | 6    | 0    | 1.371994                 | 3.079140  | 0.012891  |
| 25                     | 6    | 0    | 2.847416                 | 2.822811  | -0.279395 |
| 26                     | 6    | 0    | 3.316467                 | 1.445402  | 0.272635  |
| 27                     | 6    | 0    | 2.348337                 | 0.361346  | -0.130207 |
| 28                     | 6    | 0    | 1.067152                 | 0.586272  | -0.490830 |
| 29                     | 8    | 0    | 4.641467                 | 1.253599  | -0.275437 |
| 30                     | 6    | 0    | 5.142232                 | -0.016405 | -0.216330 |
| 31                     | 6    | 0    | 4.353150                 | -1.158037 | -0.124919 |
| 32                     | 6    | 0    | 2.892045                 | -1.018122 | -0.129201 |
| 33                     | 6    | 0    | 6.532425                 | -0.131920 | -0.282270 |

|    |   |   |           |           |           |
|----|---|---|-----------|-----------|-----------|
| 34 | 6 | 0 | 7.149125  | −1.390914 | −0.234604 |
| 35 | 6 | 0 | 6.348825  | −2.534540 | −0.118673 |
| 36 | 6 | 0 | 4.961002  | −2.418259 | −0.074385 |
| 37 | 8 | 0 | 4.255801  | −3.588005 | 0.015471  |
| 38 | 8 | 0 | 2.166016  | −2.010588 | −0.146895 |
| 39 | 8 | 0 | 0.204251  | −0.436631 | −0.848997 |
| 40 | 8 | 0 | 3.050338  | 2.906622  | −1.697983 |
| 41 | 1 | 0 | 3.454628  | 3.626363  | 0.154234  |
| 42 | 6 | 0 | 3.430643  | 1.516648  | 1.810451  |
| 43 | 6 | 0 | 8.648107  | −1.499569 | −0.282801 |
| 44 | 8 | 0 | 9.209391  | −1.022964 | 0.931267  |
| 45 | 1 | 0 | 0.388314  | 2.199133  | −1.658244 |
| 46 | 1 | 0 | −8.154387 | −2.067036 | −1.439587 |
| 47 | 1 | 0 | −6.712239 | −0.729437 | 2.400125  |
| 48 | 1 | 0 | −0.628238 | 2.456062  | 2.145938  |
| 49 | 1 | 0 | −0.408756 | 0.798321  | 1.686483  |
| 50 | 1 | 0 | −5.340845 | −0.777710 | −3.090673 |
| 51 | 1 | 0 | −9.221972 | −2.852765 | 0.672237  |
| 52 | 1 | 0 | −8.632619 | −2.303333 | 2.241257  |
| 53 | 1 | 0 | −9.582166 | −1.196429 | 1.219368  |
| 54 | 1 | 0 | −2.646784 | 1.344956  | −2.688020 |
| 55 | 1 | 0 | −2.698001 | −1.434799 | 2.382922  |
| 56 | 1 | 0 | −3.007825 | −1.892795 | 0.722993  |
| 57 | 1 | 0 | −1.461642 | −1.155829 | 1.139582  |
| 58 | 1 | 0 | −3.334243 | 0.765475  | 3.596240  |
| 59 | 1 | 0 | 1.229539  | 3.169910  | 1.093723  |
| 60 | 1 | 0 | 1.077354  | 4.043702  | −0.422086 |
| 61 | 1 | 0 | 7.145132  | 0.766302  | −0.361650 |
| 62 | 1 | 0 | 6.798695  | −3.525700 | −0.075461 |
| 63 | 1 | 0 | 3.297271  | −3.375893 | −0.025449 |
| 64 | 1 | 0 | 0.665102  | −1.297575 | −0.744000 |
| 65 | 1 | 0 | 3.953954  | 2.579560  | −1.870866 |
| 66 | 1 | 0 | 3.850297  | 0.595707  | 2.230638  |
| 67 | 1 | 0 | 4.111269  | 2.322768  | 2.108294  |
| 68 | 1 | 0 | 2.463318  | 1.685025  | 2.294187  |
| 69 | 1 | 0 | 9.049735  | −0.911648 | −1.115010 |
| 70 | 1 | 0 | 8.968189  | −2.536754 | −0.425391 |
| 71 | 1 | 0 | 8.601625  | −1.268502 | 1.649465  |



**Table S8.** Cartesian coordinates for the low-energy optimized conformer of **1g** at B3LYP/6–311+g (d,p) level of theory in CH<sub>3</sub>CN.

| Conformer of <b>1g</b> |      |      | Standard Orientation (Å) |           |           |
|------------------------|------|------|--------------------------|-----------|-----------|
| Number                 | Atom | Type | X                        | Y         | Z         |
| 1                      | 6    | 0    | 6.856004                 | −2.758031 | −0.235102 |
| 2                      | 6    | 0    | 7.667208                 | −1.649306 | 0.033181  |
| 3                      | 6    | 0    | 7.067938                 | −0.401207 | 0.247182  |
| 4                      | 6    | 0    | 5.682186                 | −0.255341 | 0.155168  |
| 5                      | 6    | 0    | 4.880772                 | −1.361487 | −0.111000 |
| 6                      | 6    | 0    | 5.470775                 | −2.615379 | −0.304348 |
| 7                      | 8    | 0    | 5.189301                 | 1.000298  | 0.371476  |
| 8                      | 6    | 0    | 3.901460                 | 1.294048  | −0.220266 |
| 9                      | 6    | 0    | 2.904015                 | 0.188311  | 0.039422  |
| 10                     | 6    | 0    | 3.422359                 | −1.192025 | −0.127566 |
| 11                     | 6    | 0    | 3.422770                 | 2.611820  | 0.465344  |
| 12                     | 6    | 0    | 1.950674                 | 2.896943  | 0.178221  |
| 13                     | 6    | 0    | 1.035965                 | 1.766906  | 0.690611  |
| 14                     | 6    | 0    | 1.626321                 | 0.384589  | 0.430027  |
| 15                     | 8    | 0    | 4.750627                 | −3.751874 | −0.556069 |
| 16                     | 6    | 0    | 9.154515                 | −1.808293 | 0.154257  |
| 17                     | 8    | 0    | 2.675843                 | −2.161744 | −0.252104 |
| 18                     | 8    | 0    | 0.749088                 | −0.660034 | 0.663867  |
| 19                     | 6    | 0    | 4.097661                 | 1.505065  | −1.738361 |
| 20                     | 1    | 0    | 3.584708                 | 2.536418  | 1.548773  |
| 21                     | 8    | 0    | 4.189362                 | 3.738283  | 0.019846  |
| 22                     | 6    | 0    | −0.427514                | 1.992866  | 0.165807  |
| 23                     | 1    | 0    | 1.024939                 | 1.872936  | 1.784738  |
| 24                     | 6    | 0    | −0.563685                | 1.660894  | −1.340999 |
| 25                     | 6    | 0    | −2.017839                | 1.482383  | −1.767056 |
| 26                     | 6    | 0    | −2.747288                | 0.387262  | −0.934166 |
| 27                     | 6    | 0    | −2.520157                | 0.615957  | 0.538009  |
| 28                     | 6    | 0    | −1.488359                | 1.327960  | 1.036642  |
| 29                     | 8    | 0    | −4.140602                | 0.510018  | −1.310931 |
| 30                     | 6    | 0    | −5.040885                | −0.113503 | −0.495350 |
| 31                     | 6    | 0    | −4.805270                | −0.385632 | 0.848540  |
| 32                     | 6    | 0    | −3.535539                | 0.038642  | 1.449940  |
| 33                     | 6    | 0    | −6.268092                | −0.447738 | −1.071975 |
| 34                     | 6    | 0    | −7.261166                | −1.096740 | −0.321498 |
| 35                     | 6    | 0    | −7.014202                | −1.367075 | 1.032442  |
| 36                     | 6    | 0    | −5.797786                | −1.010928 | 1.611968  |
| 37                     | 8    | 0    | −5.651565                | −1.297451 | 2.942353  |
| 38                     | 8    | 0    | −3.348357                | −0.075286 | 2.661089  |

|    |   |   |           |           |           |
|----|---|---|-----------|-----------|-----------|
| 39 | 8 | 0 | -1.329905 | 1.572815  | 2.391939  |
| 40 | 8 | 0 | -2.678976 | 2.753132  | -1.643656 |
| 41 | 1 | 0 | -2.060869 | 1.229860  | -2.833709 |
| 42 | 6 | 0 | -2.251981 | -1.010359 | -1.360614 |
| 43 | 6 | 0 | -8.597751 | -1.444879 | -0.922782 |
| 44 | 8 | 0 | -8.459098 | -1.764606 | -2.300307 |
| 45 | 1 | 0 | -0.635261 | 3.070047  | 0.267408  |
| 46 | 1 | 0 | 7.295831  | -3.742637 | -0.382643 |
| 47 | 1 | 0 | 7.679668  | 0.469801  | 0.476354  |
| 48 | 1 | 0 | 1.662563  | 3.843811  | 0.654214  |
| 49 | 1 | 0 | 1.814418  | 3.069186  | -0.895864 |
| 50 | 1 | 0 | 3.796116  | -3.524945 | -0.520239 |
| 51 | 1 | 0 | 9.514837  | -2.611743 | -0.496623 |
| 52 | 1 | 0 | 9.670317  | -0.891085 | -0.146443 |
| 53 | 1 | 0 | 9.422932  | -2.044106 | 1.189058  |
| 54 | 1 | 0 | 1.191513  | -1.508163 | 0.438597  |
| 55 | 1 | 0 | 3.174570  | 1.824572  | -2.233133 |
| 56 | 1 | 0 | 4.875883  | 2.251155  | -1.935595 |
| 57 | 1 | 0 | 4.430688  | 0.589073  | -2.239138 |
| 58 | 1 | 0 | 3.960465  | 4.491843  | 0.591225  |
| 59 | 1 | 0 | -0.003168 | 0.758420  | -1.604149 |
| 60 | 1 | 0 | -0.121321 | 2.480653  | -1.920890 |
| 61 | 1 | 0 | -6.448221 | -0.217243 | -2.120843 |
| 62 | 1 | 0 | -7.769923 | -1.849738 | 1.647217  |
| 63 | 1 | 0 | -4.779925 | -0.949313 | 3.236602  |
| 64 | 1 | 0 | -1.971437 | 1.015666  | 2.886191  |
| 65 | 1 | 0 | -3.632093 | 2.575171  | -1.752187 |
| 66 | 1 | 0 | -2.790647 | -1.808507 | -0.837826 |
| 67 | 1 | 0 | -2.433280 | -1.171684 | -2.429796 |
| 68 | 1 | 0 | -1.186217 | -1.154104 | -1.168053 |
| 69 | 1 | 0 | -9.278595 | -0.592533 | -0.822978 |
| 70 | 1 | 0 | -9.031131 | -2.314296 | -0.418007 |
| 71 | 1 | 0 | -9.341750 | -2.021269 | -2.616353 |

**Table S9.** Cartesian coordinates for the low-energy optimized conformer of **1h** at B3LYP/6-311+g (d,p) level of theory in CH<sub>3</sub>CN.

| Conformer of <b>1h</b> |      |      | Standard Orientation (Å) |           |           |
|------------------------|------|------|--------------------------|-----------|-----------|
| Number                 | Atom | Type | X                        | Y         | Z         |
| 1                      | 6    | 0    | 6.907165                 | -2.683360 | -0.376023 |
| 2                      | 6    | 0    | 7.703280                 | -1.579743 | -0.045872 |
| 3                      | 6    | 0    | 7.086341                 | -0.353214 | 0.233408  |
| 4                      | 6    | 0    | 5.699363                 | -0.221194 | 0.146067  |
| 5                      | 6    | 0    | 4.913717                 | -1.321836 | -0.181530 |

|    |   |   |           |           |           |
|----|---|---|-----------|-----------|-----------|
| 6  | 6 | 0 | 5.521417  | -2.555292 | -0.441095 |
| 7  | 8 | 0 | 5.189828  | 1.014501  | 0.428536  |
| 8  | 6 | 0 | 3.898054  | 1.321848  | -0.149969 |
| 9  | 6 | 0 | 2.915628  | 0.190628  | 0.046925  |
| 10 | 6 | 0 | 3.453541  | -1.171537 | -0.192871 |
| 11 | 6 | 0 | 3.401296  | 2.594388  | 0.603844  |
| 12 | 6 | 0 | 1.925697  | 2.874438  | 0.329201  |
| 13 | 6 | 0 | 1.024559  | 1.706988  | 0.777341  |
| 14 | 6 | 0 | 1.635111  | 0.348895  | 0.444077  |
| 15 | 8 | 0 | 4.816933  | -3.685949 | -0.755199 |
| 16 | 6 | 0 | 9.192221  | -1.725936 | 0.069871  |
| 17 | 8 | 0 | 2.719585  | -2.142920 | -0.371904 |
| 18 | 8 | 0 | 0.771399  | -0.718589 | 0.618822  |
| 19 | 6 | 0 | 4.094562  | 1.617441  | -1.653948 |
| 20 | 1 | 0 | 3.561709  | 2.462589  | 1.682819  |
| 21 | 8 | 0 | 4.154078  | 3.753184  | 0.222321  |
| 22 | 6 | 0 | -0.439865 | 1.941460  | 0.261684  |
| 23 | 1 | 0 | 1.010595  | 1.752802  | 1.876148  |
| 24 | 6 | 0 | -0.569202 | 1.688592  | -1.261137 |
| 25 | 6 | 0 | -2.019714 | 1.514630  | -1.699659 |
| 26 | 6 | 0 | -2.736916 | 0.366426  | -0.928516 |
| 27 | 6 | 0 | -2.515730 | 0.520303  | 0.554234  |
| 28 | 6 | 0 | -1.493656 | 1.217066  | 1.093109  |
| 29 | 8 | 0 | -4.129121 | 0.489050  | -1.305766 |
| 30 | 6 | 0 | -5.027922 | -0.176277 | -0.520745 |
| 31 | 6 | 0 | -4.792417 | -0.517836 | 0.806323  |
| 32 | 6 | 0 | -3.524858 | -0.117820 | 1.430611  |
| 33 | 6 | 0 | -6.254009 | -0.486283 | -1.115633 |
| 34 | 6 | 0 | -7.254014 | -1.155838 | -0.393175 |
| 35 | 6 | 0 | -6.994256 | -1.520834 | 0.935758  |
| 36 | 6 | 0 | -5.778437 | -1.192625 | 1.533141  |
| 37 | 8 | 0 | -5.624441 | -1.562839 | 2.842071  |
| 38 | 8 | 0 | -3.334924 | -0.301800 | 2.632966  |
| 39 | 8 | 0 | -1.340365 | 1.389349  | 2.460012  |
| 40 | 8 | 0 | -2.697180 | 2.767796  | -1.509845 |
| 41 | 1 | 0 | -2.058393 | 1.319982  | -2.778952 |
| 42 | 6 | 0 | -2.221839 | -0.998722 | -1.426381 |
| 43 | 6 | 0 | -8.567041 | -1.539665 | -1.026491 |
| 44 | 8 | 0 | -8.895404 | -0.658518 | -2.091349 |
| 45 | 1 | 0 | -0.662837 | 3.008310  | 0.420654  |
| 46 | 1 | 0 | 7.361437  | -3.652148 | -0.575911 |
| 47 | 1 | 0 | 7.686201  | 0.511845  | 0.511230  |
| 48 | 1 | 0 | 1.623586  | 3.790714  | 0.854091  |

|    |   |   |           |           |           |
|----|---|---|-----------|-----------|-----------|
| 49 | 1 | 0 | 1.788645  | 3.103052  | -0.733928 |
| 50 | 1 | 0 | 3.858914  | -3.474180 | -0.709652 |
| 51 | 1 | 0 | 9.461755  | -2.012002 | 1.091364  |
| 52 | 1 | 0 | 9.564715  | -2.487244 | -0.621767 |
| 53 | 1 | 0 | 9.697226  | -0.786379 | -0.178748 |
| 54 | 1 | 0 | 1.227068  | -1.547902 | 0.351416  |
| 55 | 1 | 0 | 3.168799  | 1.951587  | -2.133011 |
| 56 | 1 | 0 | 4.863260  | 2.382723  | -1.808099 |
| 57 | 1 | 0 | 4.441386  | 0.734582  | -2.202548 |
| 58 | 1 | 0 | 3.912009  | 4.472537  | 0.832166  |
| 59 | 1 | 0 | 0.004167  | 0.809406  | -1.570081 |
| 60 | 1 | 0 | -0.136881 | 2.543591  | -1.794637 |
| 61 | 1 | 0 | -6.432527 | -0.202998 | -2.151901 |
| 62 | 1 | 0 | -7.743625 | -2.051525 | 1.519870  |
| 63 | 1 | 0 | -4.760095 | -1.218879 | 3.158015  |
| 64 | 1 | 0 | -1.976639 | 0.798729  | 2.921568  |
| 65 | 1 | 0 | -3.649481 | 2.584869  | -1.627625 |
| 66 | 1 | 0 | -2.752356 | -1.831310 | -0.949849 |
| 67 | 1 | 0 | -2.395494 | -1.105448 | -2.503399 |
| 68 | 1 | 0 | -1.154241 | -1.139109 | -1.235660 |
| 69 | 1 | 0 | -9.373707 | -1.487740 | -0.287979 |
| 70 | 1 | 0 | -8.499868 | -2.559075 | -1.420719 |
| 71 | 1 | 0 | -9.770879 | -0.928032 | -2.415470 |

**Table S10.** Cartesian coordinates for the low-energy optimized conformer of **1i** at B3LYP/6-311+g (d,p) level of theory in CH<sub>3</sub>CN.

| Conformer of <b>1i</b> |      |      | Standard Orientation (Å) |           |           |
|------------------------|------|------|--------------------------|-----------|-----------|
| Number                 | Atom | Type | X                        | Y         | Z         |
| 1                      | 6    | 0    | 6.927965                 | -2.654575 | -0.388355 |
| 2                      | 6    | 0    | 7.715824                 | -1.554457 | -0.027939 |
| 3                      | 6    | 0    | 7.091177                 | -0.335208 | 0.269858  |
| 4                      | 6    | 0    | 5.703702                 | -0.207665 | 0.171242  |
| 5                      | 6    | 0    | 4.926000                 | -1.305753 | -0.185472 |
| 6                      | 6    | 0    | 5.541694                 | -2.530226 | -0.463683 |
| 7                      | 8    | 0    | 5.185579                 | 1.019108  | 0.473833  |
| 8                      | 6    | 0    | 3.899668                 | 1.333196  | -0.110629 |
| 9                      | 6    | 0    | 2.919939                 | 0.194818  | 0.054025  |
| 10                     | 6    | 0    | 3.465689                 | -1.161140 | -0.207900 |
| 11                     | 6    | 0    | 3.388781                 | 2.587848  | 0.663415  |
| 12                     | 6    | 0    | 1.914187                 | 2.866919  | 0.379640  |
| 13                     | 6    | 0    | 1.014722                 | 1.686594  | 0.795935  |
| 14                     | 6    | 0    | 1.634669                 | 0.338763  | 0.441627  |
| 15                     | 8    | 0    | 4.846266                 | -3.658200 | -0.808786 |

|    |   |   |           |           |           |
|----|---|---|-----------|-----------|-----------|
| 16 | 6 | 0 | 9.203639  | -1.695613 | 0.099431  |
| 17 | 8 | 0 | 2.738173  | -2.130777 | -0.414331 |
| 18 | 8 | 0 | 0.773837  | -0.736543 | 0.585850  |
| 19 | 6 | 0 | 4.108410  | 1.659305  | -1.607171 |
| 20 | 1 | 0 | 3.540499  | 2.434944  | 1.741199  |
| 21 | 8 | 0 | 4.139256  | 3.757749  | 0.311240  |
| 22 | 6 | 0 | -0.445763 | 1.924884  | 0.272501  |
| 23 | 1 | 0 | 0.991235  | 1.710616  | 1.895716  |
| 24 | 6 | 0 | -0.559802 | 1.703715  | -1.256893 |
| 25 | 6 | 0 | -2.005172 | 1.528936  | -1.712852 |
| 26 | 6 | 0 | -2.720874 | 0.360803  | -0.972854 |
| 27 | 6 | 0 | -2.515284 | 0.484655  | 0.515397  |
| 28 | 6 | 0 | -1.503366 | 1.177365  | 1.078649  |
| 29 | 8 | 0 | -4.112025 | 0.481079  | -1.359030 |
| 30 | 6 | 0 | -5.010975 | -0.209670 | -0.597620 |
| 31 | 6 | 0 | -4.785685 | -0.576050 | 0.725630  |
| 32 | 6 | 0 | -3.528205 | -0.177755 | 1.369724  |
| 33 | 6 | 0 | -6.228217 | -0.516720 | -1.209554 |
| 34 | 6 | 0 | -7.221012 | -1.222558 | -0.512730 |
| 35 | 6 | 0 | -6.983154 | -1.596808 | 0.816004  |
| 36 | 6 | 0 | -5.775893 | -1.269427 | 1.430942  |
| 37 | 8 | 0 | -5.635824 | -1.654134 | 2.736850  |
| 38 | 8 | 0 | -3.349458 | -0.381938 | 2.569442  |
| 39 | 8 | 0 | -1.364354 | 1.322776  | 2.450107  |
| 40 | 8 | 0 | -2.692956 | 2.774163  | -1.502392 |
| 41 | 1 | 0 | -2.031727 | 1.356514  | -2.795487 |
| 42 | 6 | 0 | -2.192007 | -0.990583 | -1.494224 |
| 43 | 6 | 0 | -8.527485 | -1.549617 | -1.183551 |
| 44 | 8 | 0 | -9.261840 | -0.358715 | -1.429904 |
| 45 | 1 | 0 | -0.676271 | 2.987603  | 0.451056  |
| 46 | 1 | 0 | 7.388372  | -3.616829 | -0.603373 |
| 47 | 1 | 0 | 7.684300  | 0.525508  | 0.571103  |
| 48 | 1 | 0 | 1.604309  | 3.771964  | 0.920094  |
| 49 | 1 | 0 | 1.787244  | 3.116442  | -0.679175 |
| 50 | 1 | 0 | 3.886272  | -3.451337 | -0.768053 |
| 51 | 1 | 0 | 9.464542  | -2.002012 | 1.117148  |
| 52 | 1 | 0 | 9.586947  | -2.442270 | -0.604478 |
| 53 | 1 | 0 | 9.707441  | -0.749241 | -0.125244 |
| 54 | 1 | 0 | 1.236612  | -1.558286 | 0.307580  |
| 55 | 1 | 0 | 3.185823  | 1.998943  | -2.087986 |
| 56 | 1 | 0 | 4.875704  | 2.431215  | -1.737925 |
| 57 | 1 | 0 | 4.464599  | 0.788533  | -2.169753 |
| 58 | 1 | 0 | 3.893186  | 4.461866  | 0.935870  |

|    |   |   |           |           |           |
|----|---|---|-----------|-----------|-----------|
| 59 | 1 | 0 | 0.021699  | 0.835065  | -1.578829 |
| 60 | 1 | 0 | -0.128727 | 2.573197  | -1.768405 |
| 61 | 1 | 0 | -6.406865 | -0.210044 | -2.239433 |
| 62 | 1 | 0 | -7.736281 | -2.137322 | 1.385135  |
| 63 | 1 | 0 | -4.772741 | -1.316588 | 3.066419  |
| 64 | 1 | 0 | -1.997520 | 0.717487  | 2.894220  |
| 65 | 1 | 0 | -3.640760 | 2.590600  | -1.645647 |
| 66 | 1 | 0 | -2.719590 | -1.836172 | -1.038680 |
| 67 | 1 | 0 | -2.356882 | -1.075775 | -2.573926 |
| 68 | 1 | 0 | -1.125063 | -1.127036 | -1.297927 |
| 69 | 1 | 0 | -9.142455 | -2.207645 | -0.561425 |
| 70 | 1 | 0 | -8.351139 | -2.061187 | -2.135897 |
| 71 | 1 | 0 | -9.085023 | 0.250843  | -0.692498 |

**Table S11.** Cartesian coordinates for the low-energy optimized conformer of **1j** at B3LYP/6-311+g (d,p) level of theory in CH<sub>3</sub>CN.

| Conformer of <b>1j</b> |      |      | Standard Orientation (Å) |           |           |
|------------------------|------|------|--------------------------|-----------|-----------|
| Number                 | Atom | Type | X                        | Y         | Z         |
| 1                      | 6    | 0    | 6.826985                 | -2.792852 | -0.187271 |
| 2                      | 6    | 0    | 7.645764                 | -1.688204 | 0.078917  |
| 3                      | 6    | 0    | 7.054582                 | -0.432522 | 0.279451  |
| 4                      | 6    | 0    | 5.670666                 | -0.277174 | 0.177617  |
| 5                      | 6    | 0    | 4.862156                 | -1.379268 | -0.084964 |
| 6                      | 6    | 0    | 5.443973                 | -2.637966 | -0.265568 |
| 7                      | 8    | 0    | 5.187481                 | 0.983679  | 0.381114  |
| 8                      | 6    | 0    | 3.905328                 | 1.283242  | -0.219875 |
| 9                      | 6    | 0    | 2.897421                 | 0.188164  | 0.041774  |
| 10                     | 6    | 0    | 3.406164                 | -1.197635 | -0.112474 |
| 11                     | 6    | 0    | 3.432403                 | 2.609963  | 0.452559  |
| 12                     | 6    | 0    | 1.964731                 | 2.904132  | 0.153495  |
| 13                     | 6    | 0    | 1.037840                 | 1.785403  | 0.669209  |
| 14                     | 6    | 0    | 1.619377                 | 0.397088  | 0.422595  |
| 15                     | 8    | 0    | 4.716980                 | -3.771620 | -0.514438 |
| 16                     | 6    | 0    | 9.130880                 | -1.857809 | 0.209893  |
| 17                     | 8    | 0    | 2.652177                 | -2.162385 | -0.235520 |
| 18                     | 8    | 0    | 0.731814                 | -0.639617 | 0.657356  |
| 19                     | 6    | 0    | 4.112606                 | 1.482133  | -1.739364 |
| 20                     | 1    | 0    | 3.588095                 | 2.541202  | 1.537062  |
| 21                     | 8    | 0    | 4.210867                 | 3.726657  | 0.002415  |
| 22                     | 6    | 0    | -0.420541                | 2.019560  | 0.134166  |
| 23                     | 1    | 0    | 1.021748                 | 1.899910  | 1.762338  |
| 24                     | 6    | 0    | -0.550974                | 1.677914  | -1.370429 |
| 25                     | 6    | 0    | -2.003102                | 1.505109  | -1.804511 |

|    |   |   |           |           |           |
|----|---|---|-----------|-----------|-----------|
| 26 | 6 | 0 | -2.744057 | 0.420470  | -0.968460 |
| 27 | 6 | 0 | -2.524727 | 0.659160  | 0.503973  |
| 28 | 6 | 0 | -1.490988 | 1.367805  | 1.003271  |
| 29 | 8 | 0 | -4.134636 | 0.545399  | -1.357211 |
| 30 | 6 | 0 | -5.046370 | -0.055700 | -0.537268 |
| 31 | 6 | 0 | -4.820768 | -0.319292 | 0.809964  |
| 32 | 6 | 0 | -3.548235 | 0.094282  | 1.414406  |
| 33 | 6 | 0 | -6.276180 | -0.379047 | -1.116256 |
| 34 | 6 | 0 | -7.284249 | -0.992480 | -0.356797 |
| 35 | 6 | 0 | -7.041797 | -1.274938 | 0.992688  |
| 36 | 6 | 0 | -5.821539 | -0.931629 | 1.572818  |
| 37 | 8 | 0 | -5.679104 | -1.220834 | 2.903284  |
| 38 | 8 | 0 | -3.366497 | -0.018435 | 2.625271  |
| 39 | 8 | 0 | -1.339117 | 1.620492  | 2.357610  |
| 40 | 8 | 0 | -2.656581 | 2.780602  | -1.692924 |
| 41 | 1 | 0 | -2.041862 | 1.246019  | -2.869480 |
| 42 | 6 | 0 | -2.254070 | -0.982915 | -1.380400 |
| 43 | 6 | 0 | -8.595494 | -1.356756 | -0.998764 |
| 44 | 8 | 0 | -8.408306 | -2.424752 | -1.915544 |
| 45 | 1 | 0 | -0.622130 | 3.098120  | 0.226946  |
| 46 | 1 | 0 | 7.260626  | -3.780838 | -0.325086 |
| 47 | 1 | 0 | 7.672088  | 0.433891  | 0.506121  |
| 48 | 1 | 0 | 1.681384  | 3.857152  | 0.619522  |
| 49 | 1 | 0 | 1.835835  | 3.069172  | -0.922159 |
| 50 | 1 | 0 | 3.763647  | -3.536684 | -0.485478 |
| 51 | 1 | 0 | 9.488773  | -2.669028 | -0.432662 |
| 52 | 1 | 0 | 9.656115  | -0.946597 | -0.093203 |
| 53 | 1 | 0 | 9.390228  | -2.087699 | 1.248374  |
| 54 | 1 | 0 | 1.171303  | -1.492980 | 0.444717  |
| 55 | 1 | 0 | 4.898313  | 2.218541  | -1.936977 |
| 56 | 1 | 0 | 4.442359  | 0.558851  | -2.230212 |
| 57 | 1 | 0 | 3.194980  | 1.805099  | -2.241476 |
| 58 | 1 | 0 | 3.987194  | 4.485437  | 0.568595  |
| 59 | 1 | 0 | 0.006552  | 0.770549  | -1.624734 |
| 60 | 1 | 0 | -0.100161 | 2.490779  | -1.953691 |
| 61 | 1 | 0 | -6.448337 | -0.162181 | -2.168922 |
| 62 | 1 | 0 | -7.803299 | -1.752434 | 1.606496  |
| 63 | 1 | 0 | -4.808564 | -0.875163 | 3.202418  |
| 64 | 1 | 0 | -1.984868 | 1.070556  | 2.852830  |
| 65 | 1 | 0 | -3.610931 | 2.611024  | -1.812968 |
| 66 | 1 | 0 | -2.801002 | -1.774540 | -0.855951 |
| 67 | 1 | 0 | -2.427834 | -1.151547 | -2.449962 |
| 68 | 1 | 0 | -1.189700 | -1.131379 | -1.178460 |

|    |   |   |           |           |           |
|----|---|---|-----------|-----------|-----------|
| 69 | 1 | 0 | -9.012285 | -0.497782 | -1.534533 |
| 70 | 1 | 0 | -9.330811 | -1.670624 | -0.250997 |
| 71 | 1 | 0 | -7.724776 | -3.009756 | -1.546137 |

**Table S12.** Gibbs free energy and Boltzmann population of low energy of 5*S*,7*R*,10*aR*,5'*S*,7'*R*,10*a'**R*-2 in CH<sub>3</sub>CN.

| Conformers of 5 <i>S</i> ,7 <i>R</i> ,10 <i>aR</i> ,5' <i>S</i> ,7' <i>R</i> ,10 <i>a'</i> <i>R</i> -2 | $\Delta G$ (kcal/mol) | P     |
|--------------------------------------------------------------------------------------------------------|-----------------------|-------|
| 2a                                                                                                     | 0                     | 0.288 |
| 2b                                                                                                     | 0.47                  | 0.239 |
| 2c                                                                                                     | 0.49                  | 0.237 |
| 2d                                                                                                     | 0.58                  | 0.228 |

**Table S13.** Cartesian coordinates for the low-energy optimized conformer of 2a at B3LYP/6-311+g (d,p) level of theory in CH<sub>3</sub>CN.

| Conformer of 2a |      |      | Standard Orientation (Å) |           |           |
|-----------------|------|------|--------------------------|-----------|-----------|
| Number          | Atom | Type | X                        | Y         | Z         |
| 1               | 6    | 0    | 6.494229                 | -2.684530 | -0.787475 |
| 2               | 6    | 0    | 7.301673                 | -1.816132 | -0.043099 |
| 3               | 6    | 0    | 6.755296                 | -0.615927 | 0.432791  |
| 4               | 6    | 0    | 5.412465                 | -0.307151 | 0.201518  |
| 5               | 6    | 0    | 4.615423                 | -1.173937 | -0.539666 |
| 6               | 6    | 0    | 5.161147                 | -2.363448 | -1.036370 |
| 7               | 8    | 0    | 4.972448                 | 0.881461  | 0.711646  |
| 8               | 6    | 0    | 3.545952                 | 0.985425  | 0.945657  |
| 9               | 6    | 0    | 2.728444                 | 0.455270  | -0.206733 |
| 10              | 6    | 0    | 3.228594                 | -0.791443 | -0.832387 |
| 11              | 6    | 0    | 3.286536                 | 2.507515  | 1.136203  |
| 12              | 6    | 0    | 1.798103                 | 2.836561  | 1.157346  |
| 13              | 6    | 0    | 1.074203                 | 2.369973  | -0.131363 |
| 14              | 6    | 0    | 1.620832                 | 1.058528  | -0.689397 |
| 15              | 8    | 0    | 4.448267                 | -3.259826 | -1.785307 |
| 16              | 8    | 0    | 2.532475                 | -1.477250 | -1.581285 |
| 17              | 8    | 0    | 0.906714                 | 0.555081  | -1.764910 |
| 18              | 6    | 0    | 3.215577                 | 0.232464  | 2.249769  |
| 19              | 6    | 0    | 8.749539                 | -2.137347 | 0.186754  |
| 20              | 6    | 0    | -6.111143                | -2.369567 | 0.988859  |
| 21              | 6    | 0    | -6.886605                | -1.509354 | 0.196932  |
| 22              | 6    | 0    | -6.284181                | -0.357753 | -0.334074 |
| 23              | 6    | 0    | -4.931639                | -0.091739 | -0.114319 |
| 24              | 6    | 0    | -4.171774                | -0.952110 | 0.672443  |
| 25              | 6    | 0    | -4.766755                | -2.089948 | 1.226429  |
| 26              | 8    | 0    | -4.440775                | 1.050869  | -0.681039 |



|    |   |   |           |           |           |
|----|---|---|-----------|-----------|-----------|
| 27 | 6 | 0 | -3.012656 | 1.078690  | -0.922055 |
| 28 | 6 | 0 | -2.216096 | 0.574809  | 0.256378  |
| 29 | 6 | 0 | -2.769807 | -0.613612 | 0.948260  |
| 30 | 6 | 0 | -2.687422 | 2.576265  | -1.192917 |
| 31 | 6 | 0 | -1.185372 | 2.837549  | -1.230496 |
| 32 | 6 | 0 | -0.480508 | 2.409365  | 0.080988  |
| 33 | 6 | 0 | -1.083163 | 1.153665  | 0.708225  |
| 34 | 8 | 0 | -4.093325 | -2.975914 | 2.024275  |
| 35 | 8 | 0 | -2.105640 | -1.286625 | 1.734829  |
| 36 | 8 | 0 | -0.389437 | 0.677422  | 1.809338  |
| 37 | 6 | 0 | -2.719127 | 0.244408  | -2.185300 |
| 38 | 6 | 0 | -8.349481 | -1.797831 | -0.011879 |
| 39 | 8 | 0 | 3.902079  | 3.270231  | 0.084816  |
| 40 | 8 | 0 | -3.266812 | 3.419748  | -0.182823 |
| 41 | 8 | 0 | -8.771291 | -1.337519 | -1.288346 |
| 42 | 1 | 0 | -0.688130 | 3.217822  | 0.799874  |
| 43 | 1 | 0 | 1.315258  | 3.129751  | -0.891071 |
| 44 | 1 | 0 | -3.141741 | 2.892961  | -2.139344 |
| 45 | 1 | 0 | 3.755512  | 2.853874  | 2.065858  |
| 46 | 1 | 0 | 6.900917  | -3.611072 | -1.186993 |
| 47 | 1 | 0 | 7.374663  | 0.078742  | 0.995988  |
| 48 | 1 | 0 | 1.342777  | 2.403377  | 2.052459  |
| 49 | 1 | 0 | 1.668661  | 3.923745  | 1.243656  |
| 50 | 1 | 0 | 3.549326  | -2.891601 | -1.933365 |
| 51 | 1 | 0 | 1.278611  | -0.323218 | -2.002776 |
| 52 | 1 | 0 | 2.159986  | 0.312505  | 2.524913  |
| 53 | 1 | 0 | 3.453452  | -0.835173 | 2.176156  |
| 54 | 1 | 0 | 3.817450  | 0.619434  | 3.079854  |
| 55 | 1 | 0 | 9.098531  | -1.710282 | 1.133002  |
| 56 | 1 | 0 | 8.905350  | -3.219457 | 0.241554  |
| 57 | 1 | 0 | 9.356033  | -1.732320 | -0.629458 |
| 58 | 1 | 0 | -6.551971 | -3.260739 | 1.432206  |
| 59 | 1 | 0 | -6.874383 | 0.329299  | -0.939617 |
| 60 | 1 | 0 | -0.750994 | 2.337855  | -2.100540 |
| 61 | 1 | 0 | -1.008181 | 3.912013  | -1.374135 |
| 62 | 1 | 0 | -3.178699 | -2.639247 | 2.151752  |
| 63 | 1 | 0 | -0.799971 | -0.169491 | 2.092481  |
| 64 | 1 | 0 | -1.661536 | 0.265001  | -2.464535 |
| 65 | 1 | 0 | -3.001126 | -0.806329 | -2.054819 |
| 66 | 1 | 0 | -3.305909 | 0.613102  | -3.033980 |
| 67 | 1 | 0 | -8.938070 | -1.293730 | 0.760142  |
| 68 | 1 | 0 | -8.539294 | -2.875261 | 0.034062  |
| 69 | 1 | 0 | 4.806415  | 2.917119  | -0.015032 |

|    |   |   |           |           |           |
|----|---|---|-----------|-----------|-----------|
| 70 | 1 | 0 | -4.188818 | 3.117113  | -0.074173 |
| 71 | 1 | 0 | -9.705445 | -1.589161 | -1.379792 |

**Table S14.** Cartesian coordinates for the low-energy optimized conformer of **2b** at B3LYP/6-311+g (d,p) level of theory in CH<sub>3</sub>CN.

| Conformer of <b>2b</b> |      |      | Standard Orientation (Å) |           |           |
|------------------------|------|------|--------------------------|-----------|-----------|
| Number                 | Atom | Type | X                        | Y         | Z         |
| 1                      | 6    | 0    | 6.538642                 | -2.625115 | -0.789089 |
| 2                      | 6    | 0    | 7.328251                 | -1.765583 | -0.015038 |
| 3                      | 6    | 0    | 6.764672                 | -0.581973 | 0.479878  |
| 4                      | 6    | 0    | 5.421865                 | -0.280589 | 0.236913  |
| 5                      | 6    | 0    | 4.642720                 | -1.138260 | -0.534302 |
| 6                      | 6    | 0    | 5.206967                 | -2.310758 | -1.048841 |
| 7                      | 8    | 0    | 4.964178                 | 0.892536  | 0.766193  |
| 8                      | 6    | 0    | 3.533333                 | 0.978225  | 0.982691  |
| 9                      | 6    | 0    | 2.735719                 | 0.465912  | -0.190846 |
| 10                     | 6    | 0    | 3.256310                 | -0.762262 | -0.837406 |
| 11                     | 6    | 0    | 3.257123                 | 2.494105  | 1.202945  |
| 12                     | 6    | 0    | 1.765045                 | 2.808107  | 1.211776  |
| 13                     | 6    | 0    | 1.062965                 | 2.364002  | -0.095537 |
| 14                     | 6    | 0    | 1.630142                 | 1.069295  | -0.676059 |
| 15                     | 8    | 0    | 4.512114                 | -3.198241 | -1.827283 |
| 16                     | 8    | 0    | 2.577238                 | -1.436587 | -1.610505 |
| 17                     | 8    | 0    | 0.934065                 | 0.583231  | -1.771805 |
| 18                     | 6    | 0    | 3.193012                 | 0.193436  | 2.266508  |
| 19                     | 6    | 0    | 8.775694                 | -2.079227 | 0.227560  |
| 20                     | 6    | 0    | -6.096477                | -2.457036 | 0.841538  |
| 21                     | 6    | 0    | -6.876851                | -1.572062 | 0.084988  |
| 22                     | 6    | 0    | -6.270953                | -0.419284 | -0.440621 |
| 23                     | 6    | 0    | -4.920649                | -0.150174 | -0.205479 |
| 24                     | 6    | 0    | -4.162950                | -1.020809 | 0.571716  |
| 25                     | 6    | 0    | -4.754226                | -2.176725 | 1.093041  |
| 26                     | 8    | 0    | -4.431558                | 1.002039  | -0.750730 |
| 27                     | 6    | 0    | -3.000650                | 1.050438  | -0.968358 |
| 28                     | 6    | 0    | -2.214890                | 0.528675  | 0.209256  |
| 29                     | 6    | 0    | -2.765452                | -0.679340 | 0.866607  |
| 30                     | 6    | 0    | -2.686193                | 2.557035  | -1.202130 |
| 31                     | 6    | 0    | -1.187360                | 2.833399  | -1.213929 |
| 32                     | 6    | 0    | -0.494944                | 2.383257  | 0.097055  |
| 33                     | 6    | 0    | -1.092814                | 1.107819  | 0.687613  |
| 34                     | 8    | 0    | -4.077688                | -3.081825 | 1.865434  |
| 35                     | 8    | 0    | -2.101870                | -1.368718 | 1.640789  |

|    |   |   |            |           |           |
|----|---|---|------------|-----------|-----------|
| 36 | 8 | 0 | -0.408065  | 0.613177  | 1.786790  |
| 37 | 6 | 0 | -2.680091  | 0.247127  | -2.245335 |
| 38 | 6 | 0 | -8.319226  | -1.903365 | -0.194517 |
| 39 | 8 | 0 | 3.879035   | 3.285252  | 0.176670  |
| 40 | 8 | 0 | -3.286841  | 3.371328  | -0.180930 |
| 41 | 8 | 0 | -9.079212  | -0.721939 | -0.409371 |
| 42 | 1 | 0 | -0.719083  | 3.172644  | 0.830561  |
| 43 | 1 | 0 | 1.306378   | 3.141676  | -0.836143 |
| 44 | 1 | 0 | -3.131963  | 2.890668  | -2.146905 |
| 45 | 1 | 0 | 3.709278   | 2.823836  | 2.145812  |
| 46 | 1 | 0 | 6.959435   | -3.539161 | -1.203165 |
| 47 | 1 | 0 | 7.369418   | 0.106641  | 1.066575  |
| 48 | 1 | 0 | 1.302744   | 2.351046  | 2.091123  |
| 49 | 1 | 0 | 1.624125   | 3.891631  | 1.319966  |
| 50 | 1 | 0 | 3.611950   | -2.833109 | -1.978705 |
| 51 | 1 | 0 | 1.318701   | -0.285452 | -2.023438 |
| 52 | 1 | 0 | 2.134061   | 0.258864  | 2.528601  |
| 53 | 1 | 0 | 3.441817   | -0.868864 | 2.172993  |
| 54 | 1 | 0 | 3.780474   | 0.568934  | 3.113169  |
| 55 | 1 | 0 | 9.107902   | -1.669880 | 1.187310  |
| 56 | 1 | 0 | 8.940904   | -3.160272 | 0.261837  |
| 57 | 1 | 0 | 9.389154   | -1.651289 | -0.570888 |
| 58 | 1 | 0 | -6.530877  | -3.365479 | 1.253229  |
| 59 | 1 | 0 | -6.858006  | 0.274855  | -1.039505 |
| 60 | 1 | 0 | -0.737329  | 2.357249  | -2.089333 |
| 61 | 1 | 0 | -1.019052  | 3.912215  | -1.332315 |
| 62 | 1 | 0 | -3.169351  | -2.738455 | 2.016462  |
| 63 | 1 | 0 | -0.815447  | -0.243395 | 2.046137  |
| 64 | 1 | 0 | -1.619554  | 0.281611  | -2.507267 |
| 65 | 1 | 0 | -2.956871  | -0.808985 | -2.141488 |
| 66 | 1 | 0 | -3.257157  | 0.629113  | -3.095004 |
| 67 | 1 | 0 | -8.760033  | -2.434286 | 0.656129  |
| 68 | 1 | 0 | -8.385247  | -2.531773 | -1.087856 |
| 69 | 1 | 0 | 4.788288   | 2.943378  | 0.082298  |
| 70 | 1 | 0 | -4.206620  | 3.057234  | -0.086923 |
| 71 | 1 | 0 | -10.001602 | -1.002848 | -0.530866 |

**Table S15.** Cartesian coordinates for the low-energy optimized conformer of **2c** at B3LYP/6-311+g (d,p) level of theory in CH<sub>3</sub>CN.

| Conformer of <b>2c</b> |      |      | Standard Orientation (Å) |           |           |
|------------------------|------|------|--------------------------|-----------|-----------|
| Number                 | Atom | Type | X                        | Y         | Z         |
| 1                      | 6    | 0    | -6.541433                | -2.624778 | 0.760211  |
| 2                      | 6    | 0    | -7.323310                | -1.773280 | -0.030003 |

|    |   |   |           |           |           |
|----|---|---|-----------|-----------|-----------|
| 3  | 6 | 0 | -6.755078 | -0.593517 | -0.529160 |
| 4  | 6 | 0 | -5.415657 | -0.287792 | -0.274016 |
| 5  | 6 | 0 | -4.644669 | -1.137558 | 0.514342  |
| 6  | 6 | 0 | -5.212468 | -2.306883 | 1.032549  |
| 7  | 8 | 0 | -4.953044 | 0.881342  | -0.808412 |
| 8  | 6 | 0 | -3.520474 | 0.966734  | -1.008965 |
| 9  | 6 | 0 | -2.735971 | 0.466470  | 0.177635  |
| 10 | 6 | 0 | -3.261895 | -0.756666 | 0.829366  |
| 11 | 6 | 0 | -3.242881 | 2.481528  | -1.240443 |
| 12 | 6 | 0 | -1.751550 | 2.796602  | -1.233576 |
| 13 | 6 | 0 | -1.064168 | 2.364862  | 0.086724  |
| 14 | 6 | 0 | -1.636294 | 1.075458  | 0.670720  |
| 15 | 8 | 0 | -4.525847 | -3.185329 | 1.826258  |
| 16 | 8 | 0 | -2.591010 | -1.424194 | 1.615899  |
| 17 | 8 | 0 | -0.952633 | 0.598910  | 1.778166  |
| 18 | 6 | 0 | -3.163926 | 0.171276  | -2.281984 |
| 19 | 6 | 0 | -8.767127 | -2.090078 | -0.285943 |
| 20 | 6 | 0 | 6.110999  | -2.456309 | -0.711647 |
| 21 | 6 | 0 | 6.871404  | -1.572145 | 0.064122  |
| 22 | 6 | 0 | 6.265568  | -0.407151 | 0.558357  |
| 23 | 6 | 0 | 4.918986  | -0.141313 | 0.301598  |
| 24 | 6 | 0 | 4.172780  | -1.018780 | -0.478479 |
| 25 | 6 | 0 | 4.773407  | -2.176513 | -0.986023 |
| 26 | 8 | 0 | 4.423232  | 1.018755  | 0.826475  |
| 27 | 6 | 0 | 2.988559  | 1.067698  | 1.024653  |
| 28 | 6 | 0 | 2.219569  | 0.533873  | -0.158227 |
| 29 | 6 | 0 | 2.779673  | -0.680362 | -0.797572 |
| 30 | 6 | 0 | 2.669675  | 2.575920  | 1.239349  |
| 31 | 6 | 0 | 1.169805  | 2.850705  | 1.228538  |
| 32 | 6 | 0 | 0.495609  | 2.387016  | -0.087217 |
| 33 | 6 | 0 | 1.103797  | 1.106770  | -0.658624 |
| 34 | 8 | 0 | 4.112310  | -3.082577 | -1.770531 |
| 35 | 8 | 0 | 2.129388  | -1.374371 | -1.577989 |
| 36 | 8 | 0 | 0.434815  | 0.601585  | -1.761935 |
| 37 | 6 | 0 | 2.651923  | 0.275859  | 2.304561  |
| 38 | 6 | 0 | 8.322711  | -1.847372 | 0.349681  |
| 39 | 8 | 0 | -3.876559 | 3.280375  | -0.227451 |
| 40 | 8 | 0 | 3.282910  | 3.381326  | 0.219007  |
| 41 | 8 | 0 | 9.142263  | -0.911023 | -0.333751 |
| 42 | 1 | 0 | 0.728116  | 3.169761  | -0.825152 |
| 43 | 1 | 0 | -1.318466 | 3.149495  | 0.816128  |
| 44 | 1 | 0 | 3.101564  | 2.918743  | 2.187664  |
| 45 | 1 | 0 | -3.685299 | 2.802164  | -2.190463 |

|    |   |   |           |           |           |
|----|---|---|-----------|-----------|-----------|
| 46 | 1 | 0 | -6.966478 | -3.535487 | 1.176929  |
| 47 | 1 | 0 | -7.354701 | 0.089820  | -1.127962 |
| 48 | 1 | 0 | -1.277548 | 2.332108  | -2.102871 |
| 49 | 1 | 0 | -1.609360 | 3.879254  | -1.350965 |
| 50 | 1 | 0 | -3.628324 | -2.819606 | 1.985193  |
| 51 | 1 | 0 | -1.339997 | -0.267549 | 2.034548  |
| 52 | 1 | 0 | -2.101903 | 0.235230  | -2.532388 |
| 53 | 1 | 0 | -3.412990 | -0.891129 | -2.181972 |
| 54 | 1 | 0 | -3.742224 | 0.538323  | -3.138326 |
| 55 | 1 | 0 | -9.089805 | -1.689030 | -1.253457 |
| 56 | 1 | 0 | -8.931067 | -3.171667 | -0.313112 |
| 57 | 1 | 0 | -9.390096 | -1.655825 | 0.501259  |
| 58 | 1 | 0 | 6.555978  | -3.363504 | -1.117537 |
| 59 | 1 | 0 | 6.849105  | 0.294611  | 1.153568  |
| 60 | 1 | 0 | 0.709112  | 2.382276  | 2.102761  |
| 61 | 1 | 0 | 0.998180  | 3.930283  | 1.333950  |
| 62 | 1 | 0 | 3.202796  | -2.745960 | -1.931025 |
| 63 | 1 | 0 | 0.843434  | -0.257815 | -2.007455 |
| 64 | 1 | 0 | 1.588187  | 0.313022  | 2.553773  |
| 65 | 1 | 0 | 2.930346  | -0.780138 | 2.214770  |
| 66 | 1 | 0 | 3.218826  | 0.667042  | 3.157895  |
| 67 | 1 | 0 | 8.608662  | -2.853617 | 0.024047  |
| 68 | 1 | 0 | 8.521799  | -1.777344 | 1.424212  |
| 69 | 1 | 0 | -4.788113 | 2.939973  | -0.140925 |
| 70 | 1 | 0 | 4.207574  | 3.077880  | 0.149736  |
| 71 | 1 | 0 | 8.700707  | -0.691362 | -1.171871 |

**Table S16.** Cartesian coordinates for the low-energy optimized conformer of **2d** at B3LYP/6-311+g (d,p) level of theory in CH<sub>3</sub>CN.

| Conformer of <b>2d</b> |      |      | Standard Orientation (Å) |           |           |
|------------------------|------|------|--------------------------|-----------|-----------|
| Number                 | Atom | Type | X                        | Y         | Z         |
| 1                      | 6    | 0    | 6.454829                 | -2.738907 | -0.743018 |
| 2                      | 6    | 0    | 7.271573                 | -1.865052 | -0.014337 |
| 3                      | 6    | 0    | 6.737606                 | -0.651910 | 0.441983  |
| 4                      | 6    | 0    | 5.398108                 | -0.334283 | 0.206812  |
| 5                      | 6    | 0    | 4.591152                 | -1.206562 | -0.519278 |
| 6                      | 6    | 0    | 5.124168                 | -2.408415 | -0.995464 |
| 7                      | 8    | 0    | 4.969309                 | 0.867119  | 0.695977  |
| 8                      | 6    | 0    | 3.544850                 | 0.988290  | 0.930856  |
| 9                      | 6    | 0    | 2.719969                 | 0.447324  | -0.211411 |
| 10                     | 6    | 0    | 3.206839                 | -0.815151 | -0.816035 |
| 11                     | 6    | 0    | 3.299742                 | 2.517276  | 1.095874  |
| 12                     | 6    | 0    | 1.814592                 | 2.859813  | 1.113231  |

|    |   |   |           |           |           |
|----|---|---|-----------|-----------|-----------|
| 13 | 6 | 0 | 1.085457  | 2.378709  | -0.166973 |
| 14 | 6 | 0 | 1.618533  | 1.052914  | -0.703880 |
| 15 | 8 | 0 | 4.401274  | -3.311243 | -1.727987 |
| 16 | 8 | 0 | 2.503668  | -1.506474 | -1.551728 |
| 17 | 8 | 0 | 0.897300  | 0.537427  | -1.768822 |
| 18 | 6 | 0 | 3.208879  | 0.260742  | 2.248142  |
| 19 | 6 | 0 | 8.716757  | -2.196485 | 0.219409  |
| 20 | 6 | 0 | -6.148578 | -2.265445 | 1.045090  |
| 21 | 6 | 0 | -6.916613 | -1.397556 | 0.257602  |
| 22 | 6 | 0 | -6.302163 | -0.273508 | -0.313853 |
| 23 | 6 | 0 | -4.945028 | -0.021133 | -0.105504 |
| 24 | 6 | 0 | -4.193477 | -0.875326 | 0.695791  |
| 25 | 6 | 0 | -4.798975 | -1.999386 | 1.268170  |
| 26 | 8 | 0 | -4.442843 | 1.101436  | -0.699660 |
| 27 | 6 | 0 | -3.012993 | 1.114646  | -0.936254 |
| 28 | 6 | 0 | -2.222208 | 0.623075  | 0.249696  |
| 29 | 6 | 0 | -2.786749 | -0.548772 | 0.960382  |
| 30 | 6 | 0 | -2.673802 | 2.604544  | -1.231814 |
| 31 | 6 | 0 | -1.170276 | 2.851945  | -1.273156 |
| 32 | 6 | 0 | -0.469514 | 2.438038  | 0.045854  |
| 33 | 6 | 0 | -1.083852 | 1.198933  | 0.692614  |
| 34 | 8 | 0 | -4.129895 | -2.884413 | 2.069379  |
| 35 | 8 | 0 | -2.126593 | -1.219733 | 1.753545  |
| 36 | 8 | 0 | -0.394594 | 0.733423  | 1.800878  |
| 37 | 6 | 0 | -2.725443 | 0.257661  | -2.185646 |
| 38 | 6 | 0 | -8.374860 | -1.671454 | 0.005868  |
| 39 | 8 | 0 | 3.920418  | 3.255946  | 0.030121  |
| 40 | 8 | 0 | -3.244930 | 3.469058  | -0.234887 |
| 41 | 8 | 0 | -8.570831 | -2.062521 | -1.344727 |
| 42 | 1 | 0 | -0.667772 | 3.259311  | 0.750840  |
| 43 | 1 | 0 | 1.333094  | 3.122994  | -0.939657 |
| 44 | 1 | 0 | -3.125132 | 2.911619  | -2.183114 |
| 45 | 1 | 0 | 3.773060  | 2.874423  | 2.018416  |
| 46 | 1 | 0 | 6.851050  | -3.675681 | -1.127207 |
| 47 | 1 | 0 | 7.364435  | 0.047190  | 0.992050  |
| 48 | 1 | 0 | 1.356043  | 2.445440  | 2.015080  |
| 49 | 1 | 0 | 1.694435  | 3.949478  | 1.181780  |
| 50 | 1 | 0 | 3.505875  | -2.935876 | -1.882030 |
| 51 | 1 | 0 | 1.263078  | -0.346651 | -1.993649 |
| 52 | 1 | 0 | 2.155305  | 0.356418  | 2.522366  |
| 53 | 1 | 0 | 3.436309  | -0.809458 | 2.192467  |
| 54 | 1 | 0 | 3.815182  | 0.657629  | 3.071026  |
| 55 | 1 | 0 | 8.861539  | -3.279499 | 0.292293  |

|    |   |   |           |           |           |
|----|---|---|-----------|-----------|-----------|
| 56 | 1 | 0 | 9.326087  | −1.812061 | −0.604741 |
| 57 | 1 | 0 | 9.071060  | −1.756188 | 1.156592  |
| 58 | 1 | 0 | −6.596648 | −3.147204 | 1.498005  |
| 59 | 1 | 0 | −6.886479 | 0.403835  | −0.935818 |
| 60 | 1 | 0 | −0.740270 | 2.333682  | −2.135072 |
| 61 | 1 | 0 | −0.982321 | 3.921884  | −1.433724 |
| 62 | 1 | 0 | −3.212560 | −2.555075 | 2.195725  |
| 63 | 1 | 0 | −0.811469 | −0.105830 | 2.098159  |
| 64 | 1 | 0 | −1.668403 | 0.262209  | −2.462882 |
| 65 | 1 | 0 | −3.019495 | −0.787795 | −2.039009 |
| 66 | 1 | 0 | −3.307104 | 0.618255  | −3.042257 |
| 67 | 1 | 0 | −8.973481 | −0.777244 | 0.207576  |
| 68 | 1 | 0 | −8.747393 | −2.472401 | 0.653415  |
| 69 | 1 | 0 | 4.822224  | 2.894225  | −0.062895 |
| 70 | 1 | 0 | −4.172433 | 3.183580  | −0.125662 |
| 71 | 1 | 0 | −7.787218 | −2.568788 | −1.619286 |
